1 ***Leishmania major* formins are cytosolic actin bundler play an important role in cell**  
2 **physiology**

3

4 **Renu Kushwaha<sup>1\*</sup>, Arunava Seth<sup>1\*</sup>, A.S. Jijumon<sup>1</sup>, Reshmi P.B<sup>1</sup>., Drisya Dileep<sup>1</sup>, Rupak**  
5 **Datta<sup>1#</sup> and Sankar Maiti<sup>1#</sup>**

6 <sup>1</sup>Department of Biological Sciences, Indian Institute of Science Education and Research Kolkata,  
7 Mohanpur, - 741246, Nadia, West Bengal, India

8

9 \*(contributed equally)

10 # Contributed equally

11 Correspondence:

12 Sankar Maiti (PhD)

13 Rupak Datta (PhD) [rupakdatta@iiserkol.ac.in](mailto:rupakdatta@iiserkol.ac.in)

14 Indian Institute of Science Education and Research Kolkata

15 Mohanpur, Nadia - 741246

16 West Bengal, India

17 Email: [spm@iiserkol.ac.in](mailto:spm@iiserkol.ac.in)

18

19 **ABSTRACT**

20 Formin proteins regulate actin dynamics, are conserved throughout the eukaryotes cells. They play  
21 an important role in cell adhesion, motility, vesicular trafficking, and cytokinesis. Formins from  
22 class Kinetoplastida which includes infective organisms such as *Leishmania* and *Trypanosoma* not  
23 characterized to date, even though they are shown to be important in other protozoan parasites.  
24 The protozoan parasite *Leishmania major* (*Lm*) has two homologous formin proteins; LmForminA  
25 and LmForminB. Our study showed that LmForminA and LmForminB are expressed at RNA and  
26 protein levels in *L. major* cells. LmForminA and LmForminB are localized in the cytosol in patchy  
27 distribution patterns. LmForminA and LmForminB puncta also colocalize with the actin patches.  
28 The biochemical properties of *L. major* formins divulge that both formins are potent actin  
29 nucleator. LmForminA and LmForminB bind with the actin filament and have actin-bundling

30 activity. We have also observed that formin inhibitor SMIFH2 influences the growth and  
31 physiology of *L. major* cells indicating formins are important for the Leishmania parasite.

## 32 **KEYWORDS**

33 Leishmania, formin, actin dynamics, actin bundling

34

## 35 **INTRODUCTION**

36 Leishmaniasis is caused by the intracellular protozoan parasite *Leishmania sp.* affects more than  
37 12 million people worldwide with 20,000-40,000 deaths annually, making it one of the most severe  
38 tropical neglected diseases (Okwor and Uzonna, 2016). The unavailability of vaccine and the rise  
39 of drug-resistant *Leishmania* species calls for the development of new therapeutics, emphasizing  
40 the need to study the parasite's cellular mechanisms with greater impetus (Ponte-Sucre *et al.*,  
41 2017). The parasite follows a digenetic lifestyle in mammalian hosts (such as humans), and the  
42 insect vector (Sandfly) exists in two distinct forms in the two separate hosts. The motile elongated  
43 promastigotes with long flagella in sandfly vector and as non-motile rounded amastigote form,  
44 which resides in host macrophage (Chow *et al.*, 2011; Tsigankov *et al.*, 2014). Cytoskeleton  
45 restructuring of the parasite involved in the motility and the entry in the host cells are the crucial  
46 events for the successful infection and the survival of the parasite in the phagosome (Frenal and  
47 Soldati-Favre, 2009). The decrease in cell size is probably to decrease the surface to volume ratio  
48 of the parasite to minimize contact with harsh parasitophorous vacuole (Sunter and Gull, 2017).  
49 The cytoskeletal restructuring event and range of physiological and cytological changes in  
50 *Leishmania* physiology are yet to be understood properly (Goyard *et al.*, 2003). *Leishmania*  
51 cytoskeleton is known to contain actin along with microtubule and intermediate filaments (Gull,  
52 1999).

53 *Leishmania* actin is present in the cytoplasm, flagella, flagellar pocket, nucleus and kinetoplast,  
54 shares 69.8% identity with the mammalian actin (Sahasrabudde, Bajpai and Gupta, 2004). Actin  
55 is also present on the nuclear, vacuolar, and cytoplasmic face of plasma membranes  
56 (Sahasrabudde, Bajpai and Gupta, 2004). *Leishmania* actin plays a vital role in cellular processes  
57 like microtubule-actin associated vesicle transport, organelle movement, endocytosis, basal body  
58 separation, and flagellar pocket division (Sahasrabudde, Bajpai and Gupta, 2004; Tammana et  
59 al., 2010). Some actin-binding proteins such as profilin, Arp2/3 protein, cofilin, and coronin are  
60 reported in *Leishmania*, which are involved in different cellular functions from cell division to  
61 vesicular trafficking, indicating the importance of actin in *Leishmania* physiology (Nayak *et al.*,  
62 2005; Tammana *et al.*, 2010). However, the functional aspect of an important class of actin-  
63 nucleating protein, that is, formins in *Leishmania*, remains elusive to date.

64 Formin class of proteins are long multi-domain proteins (Castrillon and Wasserman, 1994; Zeller  
65 *et al.*, 1999). FH1, FH2 and FH3 are formin homology domains present in most of the formin  
66 family of proteins. FH1 domain is a polyproline-rich region present proximately to the FH2  
67 domain. The binding of the profilin-actin complex with the FH1 region promotes the continuous  
68 addition of actin monomer molecule on actin filament growing end (Kovar and Pollard, 2004;  
69 Romero *et al.*, 2007). The FH3 domain plays a role in the formin localization in the cell (Petersen  
70 *et al.*, 1998; Kato *et al.*, 2001). Formin has a conserved FH2 domain contain around 400 amino  
71 acid residues (Kovar and Pollard, 2004; Romero *et al.*, 2007). Formin FH2 domain binds with  
72 actin molecules to help actin filaments nucleation and elongation (Pruyne *et al.*, 2002; Sagot, Klee  
73 and Pellman, 2002). Formins FH2 domain binding with filament barbed end protects from  
74 complete inhibition by the capping protein (Kovar and Pollard, 2004).

75 Phylogenetic analysis of formins described that formin is a multigene family protein (Cvrcková *et*  
76 *al.*, 2004; Li and Higgs, 2005; Rivero *et al.*, 2005; Wasserman, 1998). Multiple formin genes are  
77 present throughout the eukaryotes, such as *Plasmodium falciparum* (2 genes), *Toxoplasma gondii*  
78 (3 genes), *Caenorhabditis elegans* (6 genes), *Dictyostelium discoideum* (10 genes),  
79 *Schizosaccharomyces pombe* (3 genes), *Saccharomyces cerevisiae* (2 genes), *Drosophila*  
80 *melanogaster* (6 genes), and mammals (15 genes) (Chalkia *et al.*, 2008).

81 Biochemical and cellular characterization reveals the necessity of these formin families in  
82 eukaryotes. *In vivo* studies of *Saccharomyces cerevisiae* formins, Bnip, and Bn1p shows their  
83 role in cytokinetic actin ring and actin cable assembly (Evangelista *et al.*, 2002; Sagot, Klee and  
84 Pellman, 2002). Loss of both the formin genes in *S. cerevisiae* shows lethality (Ozaki-Kuroda *et*  
85 *al.*, 2001). The Bni1p and Bnr1p formin's biochemical functions are actin filament nucleation;  
86 additionally, bnr1 is an F-actin bundler but not bni1 (Moseley and Goode, 2005). Some formins  
87 from protozoa like *Chlamydomonas*, *Entamoeba histolytica*, *Toxoplasma*, and *Plasmodium* also  
88 have been characterized. *Chlamydomonas reinhardtii* formin CrFor1 nucleates actin molecules  
89 and helps in fertilization tubule formation in *Chlamydomonas* (Christensen *et al.*, 2019).

90 *Entamoeba formin* isoform Ehformin-1 and -2 binds with the F-actin structures and involves in  
91 cellular processes like motility, phagocytosis and cell division (Majumder and Lohia, 2008).

92 *Toxoplasma gondii* formins contribute to parasite movement and help in the host cell invasion  
93 (Daher *et al.*, 2010; Daher *et al.*, 2012). Recently it has been found that formin-2 in *Plasmodium*  
94 *falciparum* and *Toxoplasma gondii* play a vital role in apicoplast segregation (Stortz *et al.*, 2019).

95 *Plasmodium falciparum* Formin-1(PfFormin1) and formin-2 (PfFormin2) has actin  
96 polymerization. The Pf1 has been reported to have a role in invasion (Baum *et al.*, 2008).

97 Such a diverse role of these formin in parasite groups brings our attention towards a very primitive  
98 organism, *L. major*, which was thought to be evolved 80 million years ago (Chalkia *et al.*, 2008).  
99 The flagellated protozoan parasite belongs to the Kinetoplastida group (Filardy *et al.*, 2018). The  
100 literature showed that *L. major* has two putative formin genes, formin A and formin B (Chalkia *et*  
101 *al.*, 2008). However, so far, formins from *Leishmania* have not been characterized. Bioinformatics  
102 data predicted that, these formins have roles in the flagellum dynamics and intraflagellar  
103 mechanism (Vasconcelos *et al.*, 2008). In this report, we find the expression of *Leishmania major*  
104 formins; LmForminA and LmForminB at the RNA and protein levels. We also find the co-  
105 localization of formins, actin *in vivo* condition. Next, we pursued the role of the *L. major* formins  
106 in actin dynamics *in vitro* condition. Actin binding, bundling, and polymerization assay was  
107 carried out to inspect the effect of formin on actin dynamics. We also see SMIFH2 mediated formin  
108 inhibition has the impact of formins on *L. major* physiology.

## 109 **Experimental method**

### 110 *Parasite culture*

111 *L. major* Promastigotes (strain 5ASKH) were acquired from ATCC were cultured as described  
112 before (Pal *et al.*, 2015). Cells were grown at 26°C in M199 medium (Gibco) supplemented with  
113 15% fetal bovine serum (Gibco), 23.5 mM HEPES, 0.2 mM adenine, 150 µg/ml folic acid, 10  
114 µg/ml hemin, 120 U/ml penicillin, 120 µg/ml streptomycin, and 60 µg/ml gentamicin.

### 115 *Total RNA isolation and RT PCR*

116 Total RNA was isolated from *L. major* promastigotes using TRIzol reagent (Invitrogen) followed  
117 by DNase I (Invitrogen) digestion to remove genomic DNA contaminants using the manufacturer's  
118 protocols. cDNA was synthesized from 1 µg of total DNase treated RNA using an oligo(dT) primer  
119 and verso cDNA synthesis kit (Thermo Scientific) using the manufacturer's protocol. The

120 LmForminA and LmForminB FH2 domain transcripts were amplified using gene-specific primers.  
121 The primer used are same as used from LmForminA and LmForminB FH2 domain plasmid  
122 construction described below.

### 123 ***Sequence alignment & Plasmid construction***

124 *L. major* has two predicated formins in the Protein domain prediction data-base (Chalkia *et al.*,  
125 2008). Nucleic acid sequences of predicted *L. major* formins were obtained from the database at  
126 the universal protein resource (<https://www.uniprot.org/>) and  
127 (<https://www.ebi.ac.uk/ena/data/sequence/search>). *L. major* formins FH2 domains align with the  
128 other characterized formins. Multiple sequence alignment was done using the software clustal  
129 omega (<https://www.ebi.ac.uk/Tools/msa/clustalo/>) and plotted using the program ESPript 3.0  
130 (<http://esript.ibcp.fr/ESPript/ESPript/>) (Gouet *et al.*, 1999). EMBOSS Needle, pairwise sequence  
131 alignment was also done with LmForminA FH2 domain (Accession number: Q4QE97) and  
132 LmForminB FH2 domain (Accession number: Q4QAM2).

133 *L. major* genomic DNA was used to amplify the gene of interest. LmForminA (695aa-1092aa) and  
134 LmForminB (714aa-1149aa) FH2 domain was cloned into the pet28a expression vector. Forward  
135 primer 5'-GGTACGGATCCGCGAGCGGCGCAGCAGCC-3' with BamH1 recognition site and  
136 reverse primer 3'-GGCCCAAGCTTTTAGCTCTGCCGCCGCTGCTTG-5' with Hind III cut site  
137 was used to amplify the FH2 domain of LmForminA. Forward primer 5'-  
138 GGTACGGATCCAAGCCGAAGCCACAGTACACC-3' with BamHI recognition site and  
139 reverse primer 5'-GAGAAGCTTCTACTGCTCCGTCGCTTCCGG-3' with Hind III cut site used  
140 for the PCR of LmForminB FH2 domain. Site-directed mutagenesis was generated by Quikchange  
141 site-directed mutagenesis protocol. LmForminA Forward primer (5'-  
142 GTGACCGAAACGTCGGCGCTGTGCTGAAGTTTATTCGGC-3'), reverse primer (5'-

143 GCCGAATAAACTTCAGCACAGCGCCGACGTTTCGGTCAC-3'), and LmForminB forward  
144 (5'-CAACGGTTGCAGAACATGGGCGCCGCCCTCAAGCGCGTACAG-3') reverse (5'-  
145 CTGTACGCGCTTGAGGGCGGGCGCCCATGTTCTGCAACCGTTG-3') used for the mutation  
146 of isoleucine to alanine residue in FH2 domain constructs. Mutant LmForminA and LmForminB  
147 constructs were confirmed by the sequencing.

#### 148 ***Protein expression/purification studies***

149 LmForminA and LmForminB have been purified as describe in Dutta *et al* (Dutta *et al.*, 2017;  
150 Harris and Higgs, 2006; Lu *et al.*, 2007).

#### 151 ***Polyclonal Antibody generation***

152 Eight-week-old mice were injected with 50 µg of recombinant protein of LmForminA and  
153 LmForminB over five weeks. Seven days after the final injection, serum was collected and stored  
154 at -80°C with 0.01% sodium azide and 10% glycerol. The generated antibody was examined  
155 against the recombinant proteins.

#### 156 ***Western blot with Wild-type L. major cells extract***

157  $2 \times 10^8$  log phase wild-type cells were pelleted by centrifugation at 1000g for 5 mins at 4°C. The  
158 cells were washed with 1X PBS and centrifuged at 1000g for 5 mins at 4°C. The cells were then  
159 resuspended either in 100 µl of protein loading buffer (78 mM Tris-Cl pH 6.8, 0.25% SDS, 25 mM  
160 DTT, 12.5% glycerol) for LmForminA or LmForminB 100 µl of Urea lysis buffer (8 M Urea, 50  
161 mM Tris-Cl 6.8, 25 mM DTT, 0.1 mM EDTA) mixed with an equal volume of 2X protein loading  
162 buffer and boiled for 3 minutes at 100°C with intermittent slow mixing. SDS-PAGE was  
163 immediately performed with the prepared sample. LmForminA and LmForminB were detected  
164 with raised antibodies against each protein at a primary antibody dilution of 1:1000 for both diluted  
165 in TBST buffer (10 mM Tris, 150 mM NaCl, 0.005 % (v/v) Tween20). Incubation with primary

166 antibody was performed overnight in cold condition with gentle shaking. The blots were then  
167 incubated with HRP-conjugated Rabbit anti-mouse secondary antibody at dilution 1:4000 for 2  
168 hours. Finally, blots were developed using SuperSignal West Pico Chemiluminescence substrate  
169 and viewed in Syngene Chemidoc imaging system.

#### 170 ***Treatment of L. major cells with SMIFH2***

171 SMIFH2 (EMD Millipore) was freshly dissolved in dimethyl sulfoxide (100% DMSO) to prepare  
172 a 100 mM stock solution in the dark. According to the experimental requirements, further dilutions  
173 were made in DMSO before addition to the culture medium. *L.major* promastigotes were grown  
174 in a medium containing the SMIFH2 at desired concentrations for 24 hours, following which the  
175 cells were microscopically counted with a hemocytometer. Cells incubated with an equivalent  
176 concentration of DMSO (0.1%) always acted as untreated controls.

#### 177 ***Scanning electron microscopy of L. major cells***

178 The samples were prepared for electron microscopy as described elsewhere (Pal, Mondal, and  
179 Datta, 2015). Briefly,  $1 \times 10^7$  treated and untreated samples were taken and washed with chilled  
180 1X PBS and centrifuged after incubation with inhibitor (in different concentration) or equivalent  
181 concentration of DMSO or PBS for 12 hours. The cells were resuspended and fixed in 200  $\mu$ l 2.5%  
182 glutaraldehyde at 4<sup>0</sup>C for 1 hour. Cells were then pelleted and washed twice with 1X PBS, twice  
183 with Distilled water. The cells were resuspended in 200  $\mu$ l of osmium tetroxide solution for 20  
184 minutes at room temperature. Cells were again pelleted and washed with 1X PBS. The cells were  
185 gradually dehydrated by treating with a gradient of ethanol solution from 30% to 90%. Finally,  
186 cells were resuspended in absolute ethanol and spread on a cut piece of a silicon wafer, and allowed  
187 to air dry. Silicon wafer is then placed in a desiccator connected with a vacuum pump. The wafer  
188 was gold coated and viewed in Zeiss Supra 55VP scanning electron microscope. The Cell length



189 was quantified with ImageJ software cells being measured from cell end to end, excluding the  
190 flagella. At least 50 cells are counted for each experimental set. Unpaired t-test were performed.  
191  $P$ -values  $\leq 0.05$  were considered statistically significant, and levels of statistical significance are  
192 indicated as  $*P \leq 0.05$ ,  $**P < 0.01$ ,  $***P < 0.001$ ,  $****P < 0.0001$ .

### 193 ***Immunofluorescence study of *L. major* cells***

194  $2 \times 10^6$  cells were pelleted and washed with 1X PBS and spread on poly-L-Lysine coated sterile  
195 coverslip and incubated at room temperature for 30 mins. The excess culture was removed and  
196 washed with 1X PBS and fixed with 1:1 Acetone methanol solution in the dark for 10 minutes.  
197 The cells were washed with 1X PBS and permeabilized with 0.1% Triton X 100 for 2 minutes.  
198 Cells were washed with 1X PBS and blocked with 0.2% gelatin solution for 10 minutes. Mouse  
199 anti-LmForminA (1:200), mouse anti-ForminB (1:200), rabbit anti-LmCA1 (1:200), rabbit anti-  
200 LdActin (cross-reacts with LmActin) (1:2000) was added to the coverslip and incubated for 1 hour  
201 30 minutes. The cells were washed with 1X PBS twice and incubated with Alexa 488 goat anti-  
202 mouse and Alexa 488 goat anti-mouse antibodies for 1 hour 30 minutes. The cells were washed  
203 thrice with 1X PBS and finally mounted in anti-fade media containing DAPI. Cells were observed  
204 in Leica SP8 confocal microscope with a 63X oil immersion lens. All images are processed in  
205 LASX and ImageJ software. Image from single stack near center was presented in each case.

### 206 ***Actin filament Co-sedimentation assay***

207 The rabbit skeletal muscle was used for the preparation of the actin acetone powder. G-actin was  
208 purified from actin acetone powder with G-Buffer [5 mM Tris pH 8.0 (Sigma-Aldrich), 0.2 mM  
209 ATP (USB), 0.2 mM  $\text{CaCl}_2$  (USB) and 0.2 mM DTT (USB)] (Pollard 1984). LmForminA and  
210 LmForminB protein solubility increased by dialysis in TNEG5 buffer (20 mM Tris pH 8.0, 100  
211 mM NaCl, 1 mM EDTA, 5% Glycerol). Before dialysis, the protein was centrifuged at 14000 rpm

212 for 30 minutes. The Supernatant was dialyzed at 4°C. Dialyzed protein was centrifuged again  
213 before actin co-sedimentation assay. RMA (Rabbit skeletal Actin) polymerized in TEKG5 (30 mM  
214 Tris, 1 mM EGTA, 50 mM KCl, 5% Glycerol) buffer at room temperature for 1 hour, 30 minutes.  
215 The actin polymerization was initiated by an ion mix (20X= 1M KCl, 40 mM MgCl<sub>2</sub>, 10 mM  
216 ATP). Different concentrations of LmForminA and LmForminB FH2 (0.5 μM, 1 μM, 2 μM, 4  
217 μM) were incubated with F-actin for 30 minutes. After completion of the incubation, the reaction  
218 was transferred to an ultracentrifuge tube, centrifuged at 310x1000g for 30 minutes in a TLA-100  
219 rotor (Beckman Coulter). The Supernatant was separately mixed with 4X sample loading  
220 buffer. Pellets were resuspended in polymerization buffer to make up the volume and mixed with  
221 4X sample loading buffer. All the samples were boiled, loaded on SDS-PAGE. Protein visualized  
222 with Coomassie (R-250) (SRL) staining (Zimmermann *et al.*, 2016). An actin-bundling assay  
223 experiment similar except pre-polymerized actin was incubated with LmFormins for 30 minutes  
224 and the reaction mixture was centrifuged at 9.2 x1000g for 10 minutes at 4°C.  
225 The affinity of the LmForminA and LmForminB for F-actin was determined by the high-speed  
226 actin Co-sedimentation assay followed by polyacrylamide gel electrophoresis. 4μM LmForminA  
227 and LmForminB incubated with the different concentrations of F-actin (1 μM, 2 μM, 4 μM, 8 μM).  
228 The stained polyacrylamide was analyzed for densitometry using Image J software. The amount  
229 of LmForminA and LmForminB bound to F-actin was plotted vs. the concentrations of the F-actin.  
230 The dissociation constant (K<sub>D</sub>) of LmForminA and LmForminB was determined by non-linear  
231 curve fitting.

### 232 ***Surface Plasmon Resonance***

233 Interaction of actin with *L. major* formins was corroborated by the surface Plasmon resonance  
234 technique (SPR) using a Biacore T200 system. Biacore Series S Sensor Chip NTA (consists of

235 carboxymethylated dextran with covalently immobilized NTA) was utilized to capture  
236 LmForminA and LmForminB (ligand). 0.5 mM NiCl used for the binding of the poly-Histidine  
237 tags LmForminA and LmForminB. G-buffer used as a running buffer. Different concentrations of  
238 F-actin (0.5  $\mu$ M, 1  $\mu$ M, 2  $\mu$ M, 4  $\mu$ M) flown onto the capture LmForminA and LmForminB in  
239 running buffer. The LmForminA and LmForminB interaction with F-actin was monitored by an  
240 increment in the response units. Surface regeneration was conduct by introducing 800 mM  
241 imidazole for 60 seconds. Double referencing (blank of the surface without a ligand and buffer  
242 injections) was also performed to eradicate the chance of nonspecific interaction.

#### 243 ***Actin nucleation assay by fluorescence spectroscopy***

244 Unlabeled and pyrene labelled actin were mixed (10% labeled final) with G-buffer to produce 12  
245  $\mu$ M actin stock (RMA). The polymerization reaction was prepared with the 2  $\mu$ M RMA in the  
246 presence of MgCl<sub>2</sub> and EGTA. The Polymerization reaction's remaining volume makes up with  
247 the HEKG5 buffer, and different concentrations of *L. major* formins were added. Actin  
248 polymerization was initiated by adding the 20X Ion-mixed (40 mM MgCl<sub>2</sub>, 10 mM ATP, 1 M  
249 KCL) buffer. Actin polymerization was observed by the N-(1-pyrene) iodoacetamide (P-29,  
250 Molecular Probes) labelled rabbit muscle actin (RMA) for the direct observation of fluorescence  
251 at 25°C (Higgs and Pollard, 1999; Moseley *et al.*, 2006). The fluorescence of pyrene actin  
252 excitation (365 nm) and emission (407 nm) wavelength was monitored by fluorescence  
253 spectrophotometer (QM40, Photon Technology International, Lawrenceville, NJ) (Moseley *et al.*,  
254 2006). Actin assembly rates were determined by the slopes of fluorescence curves at 50 % actin  
255 polymerization (Moseley and Goode, 2005).

#### 256 ***Barbed end elongation by Fluorescence Spectroscopy***

257 10  $\mu$ M unlabeled actin was polymerized in F-buffer for 4 hours at room temperature. F-actin was  
258 sheared by passing through the 27-gauge needle for five times used as actin seed. F-buffer, along  
259 with the LmForminA and LmForminB were added to the actin seed and mixed gently. G-actin  
260 (10% pyrene-labelled) was added to actin seed with cut tips, mixed twice by pipetting up-down  
261 and final reaction placed in the fluorometer cuvette. The fluorescence was measured at 365/407nm  
262 and record for 1000 seconds (Moseley *et al.*, 2006). Elongation rate was determined by the linear  
263 fitting of the initial 100 seconds elongation (Christensen *et al.*, 2019).

264 In barbed end capping experiment capping protein and *L. major* formins were added  
265 simultaneously to the F-actin seed, then added to the actin monomers and monitor the fluorescence  
266 of the actin filament elongation.

### 267 ***TIRF Microscopy***

268 G-actin was polymerized to F-actin in polymerization buffer (10 mM Tris-Cl pH 8.0, 0.2 mM  
269 DTT, 0.2 mM ATP, 0.2 mM  $\text{CaCl}_2$ ) for 1 h at room temperature. 500 nM LmForminA and  
270 LmForminB added on the 2.5  $\mu$ M actin filaments mixed gently. Polymerization buffer, Alexa-488-  
271 phalloidin add and reaction diluted in imaging buffer [20 mM HEPES (USB), 1 mM EDTA  
272 (Sigma), 50 mM KCl (Sigma-Aldrich), and 5% Glycerol] immediately. Samples were applied on  
273 the poly-D-lysine coated 22 mm coverslip. Samples were imaged by the Olympus TIRF IX83  
274 microscopy using 100 $\times$ 1.49 N.A. objective.

275 0.5  $\mu$ M actin was polymerized in the presence of the LmForminA and LmForminB for the  
276 observation of the actin nucleation activity. The time-lapse image capture after 10 seconds interval  
277 for 10 minutes. The number of filaments quantified over time frames by using the Image J  
278 software.

### 279 **Results**

280 ***Leishmania major* possesses two formins**

281 Bioinformatics analysis of *L.major* genome predicts the presence of two putative formins  
282 LmForminA and LmForminB, in chromosomes; chromosome 17 and chromosome 24 (fig. 1A)  
283 (Ivens, 2005). Total RNA was extracted, DNase treated, and cDNA synthesized from it was used  
284 as the template for PCR with FH2 domain specific primers for both the formins. 1191 bp and 1305  
285 bp bands were observed for LmForminA and LmForminB, respectively, indicating expression at  
286 RNA level (fig. 1B). Western blot with a specific antibody raised against the FH2 domain of  
287 LmForminA, for *L. major* whole cell lysate shows a distinct band of ~180 kDa and some bands in  
288 between 100-135 kDa, which is higher than the predicted molecular weight of the protein (138.38  
289 kDa). A higher than expected molecular weight of LmForminA might be due to post-translational  
290 modifications (fig. 1C). Similarly, western blot with LmForminB specific antibody raised against  
291 the FH2 domain indicates a single band at 129.19 kDa as expected (fig. 1D). Taken together, our  
292 data confirmed that *L. major* cells constitutively express two formins, LmForminA and  
293 LmForminB.

294 ***Both LmForminA and LmForminB has patchy localization***

295 Next, we asked the question where these formins are localized within the parasite.  
296 Immunofluorescence study with LmForminA antibody shown patchy distribution with a  
297 prominent punctum near the nucleus and kinetoplast (Fig 2D). LmForminB also shows a patchy  
298 distributed pattern inside the cell. LmForminA puncta partially colocalize with *L. major* Carbonic  
299 anhydrase, a cytosolic marker (Pal et al., 2017), indicating the puncta is cytosolic (fig. 2D).  
300 Additionally, the LmForminA puncta also colocalize with the actin patches, i.e., it might be bound  
301 with the actin inside the cell, thus giving it the distinctly distributed localization (fig. S1).

302 Similarly, LmForminB puncta also colocalize with LmCA1 partially and with LmActin with in  
303 the cell.

### 304 ***Growth of Leishmania major cells are inhibited by formin inhibitor SMIFH2***

305 To check the physiological importance of formins, *L. major* promastigotes were grown in the  
306 presence of an increasing concentration of SMIFH2, a formin FH2 domain inhibitor (Rizvi *et al.*,  
307 2009), which showed a dose-dependent decrease in cell number with IC<sub>50</sub> value determined to be  
308 11.86 µM (fig. 2B). Scanning electron microscopy of the SMIFH2-treated *L.major* cells shows a  
309 morphological abnormality, where cells become shortened with rounded shape in the presence of  
310 the inhibitor (fig. 2A, C ). The length of the parasite is significantly reduced at even at 2.5 µM  
311 concentration of inhibition, which is more than one-fourth of the IC<sub>50</sub> (11.86 µM), which might  
312 indicate the rounding and reduction of cell length is not due to general stress, but due to affect in  
313 the cytoskeleton dynamic of the pathogen. In other word, formins seem to play an important role  
314 in maintaining cell shape and morphology. DMSO itself does not affect growth or morphological  
315 changes as observed with DMSO control (fig. 2A, B and C).

### 316 ***Purified Leishmania major formins can bind F-actin***

317 As both the formin had been colocalized with actin inside *L.major* cells (fig. S1), we next  
318 attempted to clone and purify LmForminA and LmForminB FH2 domain to test their interaction  
319 with F-actin (fig. S4A). LmForminA and LmForminB FH2 domains were purified as N-terminal  
320 6 His-tag protein (fig. S4B). Co-sedimentation assay with LmFormins FH2 domain and actin  
321 filaments showed that LmFormins were precipitate in the pellet fraction along with actin.  
322 However, in control experiments without actin, LmForminA and LmForminB proteins remained  
323 in the supernatant fraction (fig. 3A, B, respectively). Results indicate that LmForminA and

324 LmForminB protein have an F-actin binding ability in the *in vitro* condition with the FH2 domain  
325 similar to other well-characterized formins (Shimada *et al.*, 2004; Dutta *et al.*, 2017).  
326 The dissociation constant of LmForminA and LmForminB binds with F-actin actin were  
327 determined by analyzing the SDS-PAGE gel of co-sedimentation assay. The fraction of bound  
328 LmFormins with F-actin curve fitting shows the  $K_D$  value 1.84  $\mu$ M and 0.2  $\mu$ M for LmForminA  
329 and LmForminB, respectively (fig. S5C, D). This dissociation constant value indicated that  
330 LmForminB has a greater affinity than LmForminA. To reconfirm the LmFormins interaction with  
331 F-actin, we had used surface plasmon resonance. In this experiment, LmForminA and LmForminB  
332 were used as capture ligand and F-actin as analyte. Different concentrations (0.5 $\mu$ M, 1 $\mu$ M, 2 $\mu$ M,  
333 4 $\mu$ M) of shared F-actin filaments were used to see the interaction with LmForminA and  
334 LmForminB. Interaction of LmForminA and LmForminB with F-actin was monitored by an  
335 increase in response to different ligand which ligand concentrations (fig. 3C, D).

### 336 ***Leishmania major* formins could form an actin filament bundled**

337 Literature has depicted that some formin has side binding with actin filament leads to the  
338 formation of an actin filament bundle (Harris, Li and Higgs, 2004; Michelot *et al.*, 2005). In Bnr1p  
339 and Daam1 C-terminal domain, which have FH1, FH2, and C-terminal end, are responsible for  
340 actin filament bundling (Moseley and Goode, 2005; Barkó *et al.*, 2010). In Arabidopsis formin  
341 AFH1, the FH1 domain is also required along with the FH2 domain for actin-bundling (Michelot  
342 *et al.*, 2005). While mDia2, FRL1 formin only FH2 domain is a strong actin filament bundler  
343 (Harris *et al.*, 2006). F-actin bundling activity of formin might have very important for the  
344 physiology of the organism. However, till now, no actin-bundling activity had been shown for the  
345 formin from the protozoan Kinetoplastida group. *L. major* contains a short F-actin bundle in the  
346 cell (Sahasrabudde, Bajpai, and Gupta, 2004). We were interested to know that LmForminA and

347 LmForminB have any role in F-actin bundling. Actin-bundling ability of purified LmForminA and  
348 LmForminB was determined by co-sedimentation assay at low-speed centrifugation. Polymerized  
349 Filamentous actin at low-speed centrifugation remained in the supernatant fraction. In the presence  
350 of the LmForminA and LmForminB, F-actin co-sedimented in the pellet fraction at low-speed  
351 centrifugation that indicates actin filament bundling activity (fig. 5A, B). Fascin was used as a  
352 positive control, a well-characterized actin-bundling protein that also brings the F-actin in pellet  
353 fraction at low-speed co-sedimentation assay (fig. S5E) (Yamashiro *et al.*, 1998).

354 We used a TIRF microscope to examined the F-actin bundle formation by LmForminA and  
355 LmForminB. Pre-polymerized actin filaments were incubated with the LmFormins and stained  
356 with the phalloidin, and observed in microscopy. We found a long thick actin bundle in the  
357 presence of the LmForminA and LmForminB (fig. 5C). LmFormins induced thick actin filament  
358 bundles were quantified by measuring the thickness of the filaments. The width of the single  
359 filament compared with the thick bundled filaments. The F-actin bundled width is 2-3 times more  
360 as compared to the actin control indicated that LmForminA and LmForminB have actin-bundling  
361 ability *In vitro* conditions. More numbers of actin filament bundles were found in the presence of  
362 the LmForminA as compared to LmForminB. Results indicated that LmForminA has a strong  
363 actin-bundling activity, while LmForminB has a weak actin-bundling activity.

364 The electrostatic interaction between the FRL1 and mDia2 FH2 domain and actin is important for  
365 their bundling activity. Salt ionic strength affects the mDia2 and FRL1 FH2 domain actin-bundling  
366 activity (Harris *et al.*, 2006). We also tested whether LmForminA and LmForminB FH2 domain  
367 actin-bundling affected by the ionic strength condition like mDia2 and FRL. We find increasing  
368 the ionic concentration of KCL (50 mM, 100 mM, 150 mM) affecting the actin pelleting efficiency  
369 of the LmForminA. LmForminA actin pelleting efficiency reduced at 100 mM concentration of



370 KCl and almost lost at 150 nM KCl concentration (fig. S7A). Whereas LmForminB actin bundling  
371 activity was slightly affected with a high concentration of KCl (fig. S7B).

### 372 ***Leishmania major* formins increase actin polymerization**

373 Most characterized Formin FH2 domain shows strong activity in terms of nucleation of actin  
374 filaments in *in vitro* condition, whereas FHOD1 FH2 inhibits the polymerization of the actin  
375 filament (Schonichen *et al.*, 2013). Actin polymerization by the formin FH2 domain is also  
376 reported in human parasites like *Plasmodium falciparum*, *Toxoplasma gondii*, where formin plays  
377 some important role in their physiological function. *Plasmodium falciparum* used actin-based  
378 motility to invade the host cell, which is achieved by PfFormins. It has been shown that PfFormin1  
379 and PfFormin2 able to polymerize chicken muscle actin *in vitro* conditions (Baum *et al.*, 2008).

380 We had explored the actin nucleation activity of *L.major* formins by spontaneous actin assembly  
381 by pyrene actin fluorometric assay. 2 $\mu$ M Actin control shows polymerization at a basal level, while  
382 the LmForminA and LmForminB effectively increased actin polymerization in a concentration-  
383 dependent manner (fig. 4A, C). The comparative analysis demonstrated that LmForminB has a  
384 higher rate of actin polymerization than LmForminA (fig. 4B, D).

385 Total internal reflection fluorescence microscopes were executed to study the direct visualization  
386 of actin filament polymerization activity in the presence of the LmForminA and LmForminB.  
387 Actin was polymerized in the presence and absence of LmForminA and LmForminB and analyzed  
388 in TIRFM. More actin filaments were observed in LmForminA and LmForminB than actin control  
389 (fig. 4E).

### 390 ***Leishmania major* inhibits elongation and antagonizes the capping protein**

391 Literature has shown that the barbed end of actin filaments captured by formin affects the barbed  
392 end elongation. Formins accelerate barbed end elongation of actin filaments in the presence of the

393 profilin and decrease barbed end elongation in the absence of profilin (Patel *et al.*, 2018). We  
394 performed a barbed end elongation assay to test the effect of the LmForminA and LmForminB on  
395 actin filaments elongation.

396 We found that LmForminA and LmForminB have no effect on barbed end elongation in the  
397 presence of the lower concentration (100 nM) LmFormins. In contrast, at higher concentrations,  
398 LmForminA and LmForminB show decreased actin filaments elongation compare to actin control  
399 (fig. 6A, B). LmForminA and LmForminB inhibit the filament elongation ~63% and ~35% at 1 $\mu$ M  
400 concentration. This attribute effect might be due to the actin bundle formation by LmForminA.  
401 LmForminA induced actin bundle formation leads to shortage of free barbed end of the actin  
402 filament. So, filament's free end is not accessible for the addition of actin subunits on the barbed  
403 end. LmForminB, a weak actin bundler, has the more free filaments end for the actin filament  
404 formation.

405 Next, we performed TIRF microscopy to see the effect of LmForminA on filament elongation. 500  
406 nM LmForminA incubated with the actin filaments. Where actin bundled was appeared in the  
407 presence of LmForminA (Data not shown). Based on the observation, we speculate that the actin  
408 elongation rate was decreased due to the actin bundle formation in the presence of the LmForminA.  
409 Formin FH2 domain has a processive activity for filament barbed end. Literature shows mDia1,  
410 FRL, and Bni1 protect the barbed ends from the capping proteins (Harris, Li and Higgs, 2004;  
411 Harris *et al.*, 2006). We were interested in seeing that LmForminA and LmForminB will be able  
412 to protect the barbed end from the capping protein. Capping protein binds with the barbed end and  
413 inhibits the actin filament elongation. Here we mixed LmFormins and capping protein  
414 simultaneously with the actin filament seed and then added actin monomer to initiate the  
415 elongation. In the presence of the capping protein, LmFormins allows the actin filaments

416 elongation (fig. 6E, F). Based on the result, we speculate LmFormins not only processively binds  
417 with the barbed end and activity replacing the capping protein but might also be competing for the  
418 barbed with the capping protein.

419 ***(I-A) mutant of LmForminA and LmForminB can bind actin and bundle actin filament***

420 Isoleucine and lysine are the highly conserved amino-acid residues in the formin FH2 domain.  
421 These residues are crucial for actin assembly in most of the reported formins (Harris *et al.*, 2006;  
422 Scott, Neidt and Kovar, 2011). In Bni1 and Daam1, mutations of isoleucine to alanine altogether  
423 abolish assembly activity (Lu *et al.*, 2007; Xu *et al.*, 2004). Based on the sequence alignment of  
424 LmForminA and LmForminB with other characterized formins (fig. S2), we also find the  
425 conserved isoleucine residues in LmForminA and LmForminB. We generate a point mutation for  
426 conserved isoleucine to alanine in LmForminA and LmForminB FH2 domain at specific position  
427 (fig. S2). Interaction of mutant LmFormins with F-actin was confirmed by the surface plasmon  
428 resonance (fig. S4C, D). We had measured the actin nucleation activity of the mutant LmFormins  
429 by the pyrene actin assembly assay. We found that the I777A LmForminA has significantly less  
430 actin nucleation activity (fig. 7A). I802A LmForminB has shown a mild effect on actin assembly  
431 (fig. 7C). Actin assembly reduced 2~3 fold in the I802A LmForminB as compared to wild-type  
432 LmForminB (fig. 6D). We conclude that the conserved isoleucine residue is crucial for actin  
433 assembly in LmForminA as compared to LmForminB.

434 Mutation in conserved amino acid residues Ile to ala in frl1, mDia2 did not affect the actin-  
435 bundling activity (Harris *et al.*, 2006). In LmFormins, the influence of (I-A) mutation on the actin-  
436 bundling activity was observed by a co-sedimentation assay. The Low-speed co-sedimentation  
437 assay shows the actin pelleting activity in the presence of I777A LmForminA and I802A  
438 LmForminB (fig. S4F, G). The actin pelleting activity of I777A LmForminA is similar to wild-

439 type LmForminA. I802A LmForminB actin-bundling activity slightly increased as compared to  
440 wild-type ForminB. Similar results were obtained when wild-type and I777A LmForminA  
441 constructs incubate in the reaction before actin polymerization. Wild-type LmForminB unable to  
442 actin bundle formation in case of co-polymerization, while LmForminA actin-bundling activity  
443 does not affect. Based on the observation, we speculate that (I-A) mutation might have increased  
444 the side bundling activity of actin in LmForminB, while it does not affect LmForminA.  
445 We also performed a barbed end elongation assay to understand the effect of mutant LmFormins  
446 binding with the barbed end and protecting from capping protein. Mutant LmFormins binding with  
447 the barbed end has no significant influence on actin filaments elongation as compare to wild-type  
448 LmFormins. The addition of Capping protein on actin filaments in the presence of the Mutant  
449 LmFormins have significantly reduced the ability to protect the barbed end from capping protein  
450 in comparison to the wild-type LmFormins (fig. S6A, B). This result indicates that mutant  
451 LmFormins might have dissociated fast from the barbed end than wild-type LmFormins providing  
452 accessibility for capping protein binding.

## 453 **Discussions**

454 Formins are essential proteins involved in a range of cellular functions from cell division to  
455 trafficking (Castrillon and Wasserman, 1994; Evangelista *et al.*, 2002; Maas *et al.*, 1990; Sagot,  
456 Klee and Pellman, 2002). Recently, formins from parasitic protozoans such as *Plasmodium*,  
457 *Toxoplasma* have been shown to be very important for infectivity (Baum *et al.*, 2008; Daher *et al.*,  
458 2010; Daher *et al.*, 2012; Tosetti *et al.*, 2019; Dippe, von Dippe, and Levy, 1982; McConville *et*  
459 *al.*, 2002; Stortz *et al.*, 2019). Nevertheless, nothing was reported in the case of the Kinetoplasts  
460 *Leishmania*, although the importance of actin and other actin-binding proteins such as Arp2/3  
461 complex, cofilin, profilin are well reported (Ambaru *et al.*, 2020; Tammana *et al.*, 2010). This

462 class of distinguished actin-binding proteins formin plays a curious role in a eukaryotic organism,  
463 including a parasite group but it is still not functionally characterized in *Leishmania*.  
464 To uncover the functional aspect of formin, we first treated *L. major* cell with SMIFH2 (Formin  
465 inhibitor). Our data indicate that formin inhibitor SMIFH2 affects *L. major* cell growth. Growth  
466 inhibition was observed with SMIFH2, with IC<sub>50</sub> being 11.86 μM, which is comparable to other  
467 reports such as in fibroblast cells where cytotoxicity was observed at 28 μM in mammalian cells  
468 (Rizvi *et al.*, 2009), 40 μM in Epithelial ovarian cancer cells (Ziske *et al.*, 2016). In addition to  
469 that, cells appeared rounded, in concentration as low as 2.5 μM of SMIFH2; this might indicate,  
470 the rounding of the cell is due to perturbation of cytoskeleton dynamics rather than general stress.  
471 It confirms the importance of active formin in *L. major* physiology, which might be crucial for  
472 *Leishmania* survival. Searching in the genome database, we found two putative formins, namely  
473 LmForminA and LmForminB (Ivens *et al.*, 2005). We observed LmFormins expression at the  
474 RNA and protein levels (fig. 1A). Bands at western blot were observed in the case of protein at  
475 higher molecular weight than predicted, indicating there might be a post-translation modification  
476 (fig. 1C) similar observation has been recorded in the case of DAAM1, FMNL2 in mammalian  
477 cells (Li *et al.*, 2019). The most characterized formins use RhoA mediated regulation to regulate  
478 their activity. However, the literature and genome database has not shown the presence of RhoA-  
479 GTPase gene in *Leishmania*, which could have been necessary to regulate the formin activity in  
480 leishmania. A related RhoA-GTPase gene is present in *Trypanosoma* but is absent in *L. major*  
481 (Abbasi *et al.*, 2011). The absence of the Rho-GTPase suggests that *L. major* formins activity  
482 regulation used a distinct approach from the mammalian system. As a result, it indicates the post-  
483 translation modification in LmFormins, which might play an important role in regulating formins  
484 activity in *L. major* (DeWard and Alberts, 2009; Angeles Juanes and Piatti, 2016). The post-

485 translational modification is a well-characterized phenomenon observed in *Leishmania*  
486 (Zilberstein, 2015).

487 Next, we were interested to see how these LmFormins regulate the actin dynamics *in vivo*. To see  
488 its effect on actin dynamics first, we have to determine where these formins localized in the cell:  
489 For these localization studies, we had raised LmForminA and LmForminB specific antibody.  
490 LmForminA and LmForminB did not possess any predicted signal peptide for the secretory  
491 pathway or mitochondrial specific suggested that both the formins are localized in the cytosol. Our  
492 research group's previously studied LmCA (*L.major* carbonic anhydrase) localized in the cytosol  
493 is used as a positive control for conforming to the localization data (Pal *et al.*, 2017). LmFormins  
494 localization patches are similar to other cytoskeleton binding proteins' pattern such as myosin,  
495 coronin (Drubin, Miller, and Botstein, 1988; Sahasrabudhe, Nayak, and Gupta, 2009).  
496 LmFormins patches are colocalized with *L.major* actin indicate that LmFormins binds with the  
497 actin cytoskeleton inside *L. major* cell (fig. S1).

498 Next, we were interested to see how LmFormins regulates actin dynamics *in vitro* conditions. FH2  
499 domain is the characteristic feature of the formin family, which is the crucial player for the formin  
500 activity in regulating the actin dynamics. *L.major* putative formin genes have one FH1 and FH2  
501 domain (Chalkia *et al.*, 2008). *L.major* Formins FH2 domain sequence aligned with well-  
502 characterized formins shown the conserved amino acid with identity around 20.1%-40.9%.  
503 Pairwise alignment Results reveal that LmForminA has 57% similarity with *Trypanosoma*  
504 *cruzi* ForminA. The characterized formin of *Dictyostelium discoideum* has 44% similarity with  
505 LmForminA and 39% similarity with LmForminB (fig. S2).

506 Our study reveals that LmForminA and LmForminB FH2 domain can interact with actin *in vitro*  
507 conditions. LmFormin-FH2 domain binds with F-actin in a concentration-dependent manner. The

508 binding affinity of LmForminB shows a strong affinity with a lower  $K_D$  value (0.2  $\mu\text{M}$ ) as  
509 compared to the LmForminA ( $K_D=1.84 \mu\text{M}$ ). Lower dissociation constant of LmForminB showing  
510 comparable less affinity than to the FRL $\alpha$  and FRL $\beta$  (Harris et al., 2004). But higher affinity than  
511 the mDia1, mDia3, and Bni1(2-7 $\mu\text{M}$ ) (Harris, Li, and Higgs, 2004; Li and Higgs, 2003; Shimada  
512 *et al.*, 2004).

513 LmForminA and LmForminB also have a feature to bundle actin filaments *in vitro* condition. The  
514 low-speed co-sedimentation assay is indicating the LmFormins has actin-bundling properties.  
515 Microscopic observation of F-actin in the presence of the LmForminA and LmForminB has  
516 confirmed their actin-bundling feature. Earlier reports already describe some formins having actin  
517 filaments bundling activity. These actin-bundling formins are budding yeast Bnr1p (Moseley and  
518 Goode, 2005), *Dictyostelium* ForC (Junemann *et al.*, 2013), mammalian FRL1, and mDia2 (Harris  
519 *et al.*, 2006), *Arabidopsis* AFH1 (Michelot *et al.*, 2005), *Drosophila* FHOD1 and FHOD3 (Patel  
520 *et al.* 2018) and *Drosophila* Daam1 (Barkó *et al.* 2010). Most recently reported mice delphilin is  
521 a weak actin bundler (Silkworth *et al.*, 2018). According to the literature, in the protozoan parasite  
522 group, only *Toxoplasma gondii* formins have actin-bundling activity (Skillman *et al.*, 2012). The  
523 above-characterized actin-bundling formins have a common feature: they possess positively  
524 charged amino acids in FH2 domains with higher PI value. LmForminA FH2 domain used in this  
525 study has a PI value of 8.31, which is higher than the mDia1 and Bni1 (PI value 6.37 and 5.64,  
526 respectively) could not form an actin bundle. FRL1 and mDia2 (PI value 8.26 and 8.14,  
527 respectively) can firmly form an actin bundle. PI value of LmForminA 8.31 is close to the PI value  
528 of mDia2 and FRL1 (Harris *et al.*, 2006). LmForminB, a weak actin bundler, has a PI value of  
529 7.09, which is higher than the PI value of 5.89 for Delphilin, also a weak actin bundler (Silkworth  
530 *et al.*,2018). As an earlier hypothesis, the net positively charged amino-acid of the FH2 domain

531 involved in the actin bundle formation while the net negativity charge FH2 domain could not form  
532 actin bundle (Harris *et al.*,2006). The bundling activity difference in formins indicates that the  
533 positively charged amino-acids of the FH2 domain might mediate the electrostatic interaction with  
534 the negatively charged actin filament residues for actin bundling. We find, this presumption is  
535 strongly supported by the salt susceptibility of LmFormins bundling activity, which might reduce  
536 the electrostatic interaction are significant for actin-bundling activity. mDia1 (PI value 6.37) net  
537 negatively charged amino-acids at the outer surface would not form an actin bundle (Harris *et al.*,  
538 2006). In the absence of the crystal structure of the LmForminA and LmForminB, we could not  
539 describe the outer surface amino-acids, but the LmForminB PI value slightly higher than the  
540 mDia1 supports this kind of assumption (Harris *et al.*, 2006).

541 *L. major* actin present in the patches (Sahasrabuddhe, Bajpai, and Gupta, 2004). It has been  
542 reported that coronin protein is vital for actin-bundling in *Leishmania* (Nayak *et al.*, 2005). Actin  
543 bundled structure formation in *Leishmania* might not be solely coronin dependent. Formins might  
544 be playing a pivotal role in actin bundle formation inside the *Leishmania* cell. What are the  
545 physiological effects of this actin bundle in *Leishmania* is not still clear. LmForminA and  
546 LmForminB actin bundling activity differences might point to their different phenotype,  
547 localization, and regulation. *In vitro* biochemical assay based on the pyrene labelled actin assembly  
548 shows that LmFormins increase the actin polymerization concentration-dependent manner.  
549 LmForminB is a more potent actin nucleator as compare to LmForminA. The intense nucleation  
550 activity of LmForminB as compare to LmForminA might have some physiological significance *in*  
551 *vivo*.

552 In the actin assembly rate comparison, LmForminA with mammalian Formin Daam1 exhibits a  
553 similar polymerization rate. While LmForminB has a four-fold higher polymerization rate. The



554 important role of the actin polymerization in the presence of the formins has already been reported  
555 in some protozoan parasites. In *Toxoplasma gondii* formin, TgFRM1, TgFRM2 & TgFRM3 is also  
556 a potent actin nucleator *in vitro* condition. TgFRM1 and TgFRM2 formin play an essential role in  
557 parasite mobility and host cell invasion (Daher *et al.*, 2010). The malaria parasite *Plasmodium*  
558 *falciparum* invade host cell by using actin-based motility, which shows that formin is important in  
559 actin polymerization involved in the motility (Baum *et al.*, 2008). Structural analysis of the Bni1p  
560 and mDia1 has shown that conserved amino-acid Ile residue faces the inside of the FH2  
561 homodimer, this residue of the FH2 domain creates important interaction with the actin molecule  
562 (Xu *et al.*, 2004). Moreover, a mutation in this residue completely abolishes actin assembly.  
563 Investigating the point mutation (Ile-ala) in LmFormins, we found it has a different effect on actin  
564 assembly. This mutation completely abolishes the actin assembly of LmForminA, similarly Daam1  
565 and *Drosophila* Fhod (Barkó *et al.*, 2010; Xu *et al.*, 2004). Mutant LmForminB has a mild effect  
566 on actin assembly. The Ile-ala mutant of FRL1 also has a mild effect on the actin assembly (Harris  
567 *et al.*, 2006).

568 (I-A) mutation might affect the flexibility of the FH2 domain and might suppress the switch from  
569 the closed to the open configuration during actin assembly. To understand the actual mechanism,  
570 the resolution of the FH2 domain structure of LmForminA and LmForminB in the presence of the  
571 actin would be necessary.

572 In barbed end elongation assay, we find LmFormins did not accelerate the barbed end elongation.  
573 It was not an unexpected result because some formin such as *Drosophila* Fhod, *Drosophila* Daam1,  
574 and mice FRL $\alpha$  also share this classical characteristic of the barbed end elongation (Barkó *et al.*,  
575 2010; Patel *et al.* 2018; Harris, Li, and Higgs, 2004). LmFormins reduced the barbed end  
576 elongation in the absence of the profilin like the *Drosophila* Fhod. LmFormins slows the barbed

577 end elongation due to its binding of the FH2 domain that spends most of the time in a closed  
578 conformation similar to *Drosophila* Fhod (Barkó *et al.*, 2010). LmFormins binds to the barbed and  
579 protects from the capping protein. LmFormins barbed end binding and antagonizing the capping  
580 protein nature Indicates that (1) LmFormins and capping protein might passively compete for the  
581 barbed end binding on elongating filaments. (2) LmFormins form a processive cap that maintains  
582 an association with the barbed end during filament elongation and replacing the capping protein  
583 from the barbed end. Compared to wild-type LmFormins, mutants have similar actin elongation  
584 activity but have significantly less barbed end protecting activity from the capping protein.  
585 Similarly, Ile to ala mutation in *Drosophila* Fhod, FRL1, and mDia1FH2 also decrease the barbed  
586 end elongation (Barkó *et al.*, 2010; Harris *et al.*, 2006).

587 Our study shows the biochemical properties of the LmFormins FH2 domain and its effects on the  
588 actin dynamics. LmFormins FH2 domain overall features are similar to the other Formins.  
589 However, it is still unclear what are the exact role of LmFormins in *Leishmania* physiology. Some  
590 other important domains, such as RBD, DAD, DID are not predicted in the case of LmFormins.  
591 Together, this indicates, there are most probably differences in regulation of formins in *Leishmania*  
592 compare to mammalian counterpart. Exploration of such might lead to new therapeutics against  
593 the vicious parasite.

#### 594 **Acknowledgements:**

595 The authors sincerely thank Mr. Kashinath Sahu for their expert technical assistance in SEM  
596 imaging and Jajati Keshari Ray for mice handling. The authors also thank Dr. Amogh  
597 Sahasrabuddhe for providing the LdActin antibody. The authors also thank Dr. Arnab Gupta,  
598 Raturaj and DBT Welcome imaging facility, IISER Kolkata for helping with confocal microscopy.  
599 The authors also thank Dr. Bidisha Sinha for providing TIRF microscopy for imaging and Rinku

600 Kumar Patel, Madhura Chakraborty and Arikta Biswas for their assistance in TIRF microscopy  
601 imaging.

602 **Competing interests:**

603 The authors declare that they do not have any conflict of interests.

604 **Author contributions:**

605 Conceived and designed the experiments: SM RD. Performed the experiments: RK AS JAS RPB  
606 DD. Analyzed the data: SM RD. Wrote the manuscript: SM RD RK AS JAS.

607 **Funding:**

608 R.K. was supported by an individual fellowship from the University Grant Commission and A.S.  
609 was supported by an individual fellowship from the Council of Scientific and Industrial Research,  
610 Government of India. The work was supported by Department of Biotechnology funding number  
611 BT/PR26167/MED/29/1229/2017

612 **FIGURE LEGENDS**

613 **Figure 1. Expression of the two Formins in *Leishmania major*.**

614 [A] Schematics diagram showing the organization of the predicated FH2 domain of LmForminA  
615 and LmForminB. The LmFormins constructs used in this work span residue is LmForminA(695-  
616 1092aa) and LmForminB (714-1149aa) with predicted PCR products of 1191 bp and 1305 bp. [B]  
617 Expression analysis of LmForminA and LmForminB by RT-PCR. The lanes marked –RT  
618 represents negative control with the RT enzyme. Bands of 1191 bp and 1305 bp observed in  
619 LmForminA and LmForminB FH2 domain PCR respectively. [C] Western blot with anti-Formin  
620 A and anti-Formin B antibodies with *L. major* whole cell lysate.

621 **Figure 2. SMIFH2 affects the growth of *Leishmania major* Growth.**

622 [A] Scanning electron micrographs of SMIFH2 treated and untreated *L. major* cells. Cells were  
623 treated 12 hours with/without SMIFH2 in respective concentrations. Images were acquired Zeiss  
624 Supra 55VP scanning electron microscope. [B] Cell lengths were quantified using ImageJ  
625 software. Asterisks indicate a significant difference between untreated with respect to treated cells.  
626 \*\* $P < 0.01$  \*\*\*\* $P < 0.0001$  (Student's *t*-test). [C] Growth kinetics of *L. major* cells in the presence of  
627 formin inhibitor SMIFH2 grown for 24 hours. The cell number was normalized with respect to  
628 DMSO control. Error bar represents the standard deviation from 3 independent experiments. [D]  
629 Confocal imaging of *L. major* cells immunostained with DAPI (blue), anti-Formin A, and anti-  
630 Formin B (green) (1:200) anti-LmCA1 (cytosolic marker) (red) (1:200), acquired in LeicaSP8  
631 confocal microscope. Partial colocalization (yellow) was observed in both cases. Scale bar  
632 represents 10  $\mu\text{m}$ .

633 **Figure 3. *L. major* ForminA and ForminB bind with F-actin *in vitro* conditions.**

634 [A, B] 10% Coomassie-stained SDS-PAGE of LmForminA and LmForminB binds to F-actin.  
635 LmForminA and LmForminB incubated with F-actin for actin binding. Co-sediment at high-speed  
636 centrifugation for analyzed the LmForminA and LmForminB binding. LmForminA and  
637 LmForminB actin control most of the protein that remains in the supernatant fraction, while actin  
638 controls most of the fraction that remains in the pellet. LmForminA and LmForminB, which bind  
639 with the actin present in the pellet, indicated binding with F-actin. [C, D] Surface Plasmon  
640 resonance was performed to see the interaction of LmForminA and LmForminB with F-actin.  
641 LmForminA and LmForminB capture on an NTA chip and different concentrations of F-actin (0.5,  
642 1, 2, 4  $\mu\text{M}$ ) flowed on capture LmForminA and LmForminB. The Sensorgram has shown the

643 interaction phase of LmForminA [C] and LmForminB [D], followed by the dissociation phase.

644 The interaction has been seen by an increase in response in a concentration-dependent manner.

645 **Figure 4. *L.major* ForminA and ForminB efficiently accelerate an actin assembly *in vitro***  
646 **condition.**

647 [A, B] 2  $\mu$ M rabbit muscle actin (10% pyrene-labeled) used for actin assembly. Data (A, B) shows  
648 actin assembly in the presence or absence of LmForminA and LmForminB respectively. Actin  
649 assembly increased in a concentration-dependent manner in the presence of the LmForminA and  
650 LmForminB. [C, D] Data (A, B) was used for the quantification of actin assembly rate at half-  
651 maximal polymerization of actin in the presence of a different concentration of LmForminA and  
652 LmForminB. A.U., arbitrary units. [E] 0.5  $\mu$ M Actin used for polymerization in the presence or  
653 absence of 25 nM LmForminA and 10 nM LmForminB, respectively. Alexa-488-phalloidin is used  
654 for the staining of actin. The image was captured by TIRF microscopy. A time-lapse image has  
655 captured shows an increase in the number of filaments in the presence of the LmForminA and  
656 LmForminB as compared to actin control. Scale bar 10  $\mu$ M.

657 **Figure 5. *L.major* Formin A and Formin B formed F-actin bundled *in vitro* conditions.**

658 [A, B] 10% Coomassie-stained SDS-PAGE of LmForminA (A) and LmForminB (B) to verify the  
659 F-actin bundling. F-actin incubate with LmFormins and Co-sediment at low-speed centrifuge.  
660 Actin bundled coming in pellet fraction in the presence of the LmForminA and LmForminB,  
661 indicating formin bundling nature. [C] TIRF Microscopic image for direct visualization of the  
662 event in actin-bundling in the presence of the 500 nM LmForminA and 500 nM LmForminB.  
663 LmForminA and LmForminB protein mixed with 2.5  $\mu$ M polymerized Actin filaments stained  
664 with Alexa-488-phalloidin. 20  $\mu$ l diluted reaction taken inflow chamber imaged capture by the

665 TIRF Microscope. Thick filaments bundled were capture in the presence of the formin. The scale  
666 bar is 10  $\mu$ M. Actin-bundling fascin served as a positive control.

667 **Figure 6. *L.major* Formins inhibits actin elongation and antagonizes capping protein.**

668 [A, B] Actin elongation performed in the presence of the preformed actin seed. Preformed actin  
669 seed was prepared by F-actin passing from the 27 gauge needle five times. Actin seed mixed with  
670 (10%) pyrene labelled G-actin. Actin elongation was performed in the presence and absence of  
671 different concentrations of LmForminA and LmForminB. Actin elongation decrease in the  
672 presence of LmForminA and LmForminB in a concentration-dependent manner. [C, D] Elongation  
673 rate quantification from (A, B) measured as the initial slope over the first 100 seconds. [E, F] 0.5  
674  $\mu$ M G-actin (10% pyrene-labelled) with F-actin seed used in actin elongation with various  
675 concentrations of LmForminA and LmForminB. LmForminA and LmForminB mixed before the  
676 capping protein to see the LmFormins antagonize to capping protein. Actin elongated in the  
677 presence of LmFormins, antagonizing the capping protein from the barbed ends.

678 **Figure 7. *L.major* Formins nucleation efficiency is affected by I-A mutation.**

679 [A] Direct comparison of actin assembly in the presence of the wild-type and mutant I777A  
680 LmForminA. Actin assembly severely affected in mutantI777A LmForminA. [B] Actin  
681 polymerization in the presence of the wild-type LmForminB and mutantI802A LmForminB.  
682 Mutation in conserved amino acid residues I802A has shown a mild effect on actin assembly. [C,  
683 D] Actin polymerization rate quantification from (A, B) respectively.

684 **Supplementary Figure**

685 **Figure S1. LmFormins co-localized with the actin *in vivo* condition.**

686 Confocal imaging of *L. major* cells immunostained with DAPI (blue), Anti-Formin A, and Anti-  
687 Formin B (green) (1:200) LdActin (cross-reacts with LmActin) (red) (1:2000), acquired in

688 LeicaSP8 confocal microscope. Partial colocalization (yellow) was observed in both cases  
689 indicated with white arrows. Scale bar represents 10  $\mu$ m.

690 **Figure S2. LmFormins has a conserved amino-acids similar to the other characterized**  
691 **formins.**

692 Multiple alignments of the amino-acid sequence of the FH2 domain of the LmForminA and  
693 LmForminB from different organisms. *L. major* putative formin A (Q4QE97) and formin B  
694 (Q4QAM2) amino acid sequence compared to the characterized formin FH2 domain from human  
695 Daaam1(Q944D1), mouseDial1 (o08808), *Dictyostelium discoideum* (Q54N00), *Arabidopsis*  
696 *thaliana* (Q9SE97), *Saccharomyces cerevisiae* (P41832, P40450), *Trypanosoma cruzi* (Q4D1V1).  
697 Strictly conserved residues are shown in the black box, identical residues are boxed in red. While  
698 sites showing the similarities are shown in a blue box. Dashes indicate gaps introduced for optimal  
699 alignment

700 **Figure S3. Pairwise alignment shows LmFormins has some identical amino-acids as other**  
701 **eukaryotic organisms.**

702 LmForminA and LmForminB Pairwise alignment data with different formins are shown in the  
703 table.

704 **Figure S4. Ile-Ala Mutant LmForminA and LmForminB interact with the F-actin and can**  
705 **still form actin bundle.**

706 **[A]** Purified plasmids of LmForminA and LmForminB FH2 domain are shown in lane 1, 2 along  
707 with an empty vector in lane 1. Cloned LmFormins plasmids digestion with BamHI and HindIII  
708 leading to expected bands at 1.19kb and 1.3kb. **[B]** 10% Coomassie-stained SDS-PAGE gel of  
709 purified formin A and ForminB protein used in this study. **[C, D]** The Sensorgram has shown the  
710 interaction phase of LmForminA **[C]** and LmForminB **[D]**, followed by the dissociation phase.

711 The interaction has been seen by an increase in response in a concentration-dependent manner. [E]  
712 Fascin used as a positive control of actin-bundling. [F] SDS-PAGE image of low-speed actin co-  
713 sedimentation assay in the presence of the 5  $\mu$ M actin with different concentration of mutant  
714 I777ALmForminA (1 $\mu$ M, 2  $\mu$ M, 4  $\mu$ M). The amount of actin coming in the pellet in the presence  
715 of formin represent the actin-bundling activity. [G] SDS-PAGE image of low-speed actin co-  
716 sedimentation assay in the presence of the 5  $\mu$ M actin with different concentration of I802A mutant  
717 LmForminB (0.5 $\mu$ M, 1 $\mu$ M, 2 $\mu$ M). The amount of actin coming in the pellet in the presence of  
718 formin represent the actin-bundling activity.

719 **Figure S5. *Leishmania major* formins binding affinity determination with the F-actin.**

720 [A, B] LmForminA and LmForminB binding affinity with F-actin was determined by the fraction  
721 of LmFormins bound to the F-actin. Co-sedimentation assay SDS-PAGE gel image used for the  
722 densitometry analysis. [C, D] The dissociation constant determined by the non-linear curve fitting.

723 **Figure S6. Ile Mutant LmForminA and LmForminB can still inhibit the actin elongation,**  
724 **but lost CapZ replacement activity *in vitro* condition.**

725 [A, B] 0.5  $\mu$ M G-actin (10% pyrene-labelled) with F-actin seed used in actin elongation with  
726 various concentrations of Mutant LmForminA and LmForminB. LmFormins mixed before the  
727 capping protein to see the mutant LmFormins antagonize to capping protein. Actin elongated in  
728 the presence of mutant LmFormins, antagonizing the capping protein from the barbed ends.

729 **Figure S7. LmForminA and LmForminB F-actin-bundling activity is affected in presence**  
730 **high salt concentration.**

731 [A, B] Coomassie-stained SDS-PAGE of the low-speed pelleting assay using 5 $\mu$ M polymerized  
732 actin and increasing concentrations of LmForminA and LmForminB. Only pellets are shown. F-



733 actin bundling was conducted in polymerization buffer with 50, 100, 150mM KCl final  
734 concentration.

735 **References:**

- 736 **Abbasi, K., DuBois, K. N., Dacks, J. B. and Field, M. C.** (2011). A Novel Rho-Like Protein  
737 TbRHP Is Involved in Spindle Formation and Mitosis in Trypanosomes. *PLoS ONE* **6**, e26890.
- 738 **Ambaru, B., Gopalsamy, A., Satish Tammana, T. V., Subramanya, H. S. and Gupta, C. M.**  
739 (2020). Actin sequestering protein, profilin, regulates intracellular vesicle transport in  
740 Leishmania. *Molecular and Biochemical Parasitology* **238**, 111280.
- 741 **Barkó, S., Bugyi, B., Carlier, M.-F., Gombos, R., Matusek, T., Mihály, J. and Nyitrai, M.**  
742 (2010). Characterization of the biochemical properties and biological function of the formin  
743 homology domains of Drosophila DAAM. *J. Biol. Chem.* **285**, 13154–13169.
- 744 **Baum, J., Tonkin, C. J., Paul, A. S., Rug, M., Smith, B. J., Gould, S. B., Richard, D.,**  
745 **Pollard, T. D. and Cowman, A. F.** (2008). A malaria parasite formin regulates actin  
746 polymerization and localizes to the parasite-erythrocyte moving junction during invasion. *Cell*  
747 *Host Microbe* **3**, 188–198.
- 748 **Castrillon, D. H. and Wasserman, S. A.** (1994). Diaphanous is required for cytokinesis in  
749 Drosophila and shares domains of similarity with the products of the limb deformity gene.  
750 *Development* **120**, 3367–3377.
- 751 **Chalkia, D., Nikolaidis, N., Makalowski, W., Klein, J. and Nei, M.** (2008). Origins and  
752 Evolution of the Formin Multigene Family That Is Involved in the Formation of Actin Filaments.  
753 *Molecular Biology and Evolution* **25**, 2717–2733.
- 754 **Chow, C., Cloutier, S., Dumas, C., Chou, M.-N. and Papadopoulou, B.** (2011). Promastigote  
755 to amastigote differentiation of Leishmania is markedly delayed in the absence of PERK  
756 eIF2alpha kinase-dependent eIF2alpha phosphorylation. *Cellular Microbiology* **13**, 1059–1077.
- 757 **Christensen, J. R., Craig, E. W., Glista, M. J., Mueller, D. M., Li, Y., Sees, J. A., Huang, S.,**  
758 **Suarez, C., Mets, L. J., Kovar, D. R., et al.** (2019). Chlamydomonas reinhardtii formin FOR1  
759 and profilin PRF1 are optimized for acute rapid actin filament assembly. *Molecular Biology of*  
760 *the Cell* **30**, 3123–3135.
- 761 **Cvrčková, F., Novotný, M., Pícková, D. and Žárský, V.** (2004). Formin homology 2 domains  
762 occur in multiple contexts in angiosperms. *BMC Genomics* **5**,.
- 763 **Daher, W., Plattner, F., Carlier, M.-F. and Soldati-Favre, D.** (2010). Concerted Action of  
764 Two Formins in Gliding Motility and Host Cell Invasion by Toxoplasma gondii. *PLoS*  
765 *Pathogens* **6**, e1001132.

- 766 **Daher, W., Klages, N., Carlier, M.-F. and Soldati-Favre, D.** (2012). Molecular  
767 Characterization of Toxoplasma gondii Formin 3, an Actin Nucleator Dispensable for Tachyzoite  
768 Growth and Motility. *Eukaryotic Cell* **11**, 343–352.
- 769 **DeWard, A. D. and Alberts, A. S.** (2009). Ubiquitin-mediated degradation of the formin mDia2  
770 upon completion of cell division. *J. Biol. Chem.* **284**, 20061–20069.
- 771 **Dippe, P. von, von Dippe, P. and Levy, D.** (1982). Analysis of the transport system for  
772 inorganic anions in normal and transformed hepatocytes. *Journal of Biological Chemistry* **257**,  
773 4381–4385.
- 774 **Dutta, P., Das, S. and Maiti, S.** (2017). Non diaphanous formin delphilin acts as a barbed end  
775 capping protein. *Exp. Cell Res.* **357**, 163–169.
- 776 **Evangelista, M., Pruyne, D., Amberg, D. C., Boone, C. and Bretscher, A.** (2002). Formins  
777 direct Arp2/3-independent actin filament assembly to polarize cell growth in yeast. *Nature Cell*  
778 *Biology* **4**, 32–41.
- 779 **Filardy, A. A., Guimarães-Pinto, K., Nunes, M. P., Zukeram, K., Fliess, L., Pereira, L.,**  
780 **Nascimento, D. O., Conde, L. and Morrot, A.** (2018). Human Kinetoplastid Protozoan  
781 Infections: Where Are We Going Next? *Frontiers in Immunology* **9**,.
- 782 **Frénel, K. and Soldati-Favre, D.** (2009). Role of the Parasite and Host Cytoskeleton in  
783 Apicomplexa Parasitism. *Cell Host & Microbe* **5**, 602–611.
- 784 **Gouet, P., Courcelle, E., Stuart, D. and Metz, F.** (1999). ESPript: analysis of multiple  
785 sequence alignments in PostScript. *Bioinformatics* **15**, 305–308.
- 786 **Goyard, S., Segawa, H., Gordon, J., Showalter, M., Duncan, R., Turco, S. J. and Beverley,**  
787 **S. M.** (2003). An in vitro system for developmental and genetic studies of Leishmania donovani  
788 phosphoglycans. *Molecular and Biochemical Parasitology* **130**, 31–42.
- 789 **Gull, K.** (1999). The Cytoskeleton of Trypanosomatid Parasites. *Annual Review of Microbiology*  
790 **53**, 629–655.
- 791 **Harris, E. S. and Higgs, H. N.** (2006). Biochemical Analysis of Mammalian Formin Effects on  
792 Actin Dynamics. *Methods in Enzymology* 190–214.
- 793 **Harris, E. S., Li, F. and Higgs, H. N.** (2004). The Mouse Formin, FRL $\alpha$ , Slows Actin Filament  
794 Barbed End Elongation, Competes with Capping Protein, Accelerates Polymerization from  
795 Monomers, and Severs Filaments. *Journal of Biological Chemistry* **279**, 20076–20087.
- 796 **Harris, E. S., Rouiller, I., Hanein, D. and Higgs, H. N.** (2006). Mechanistic differences in actin  
797 bundling activity of two mammalian formins, FRL1 and mDia2. *J. Biol. Chem.* **281**, 14383–  
798 14392.
- 799 **Higgs, H. N. and Pollard, T. D.** (1999). Regulation of Actin Polymerization by Arp2/3 Complex  
800 and WASp/Scar Proteins. *Journal of Biological Chemistry* **274**, 32531–32534.

- 801 **Ivens, A. C.** (2005). The Genome of the Kinetoplastid Parasite, *Leishmania major*. *Science* **309**,  
802 436–442.
- 803 **Juanes, M. A. and Piatti, S.** (2016). Control of Formin Distribution and Actin Cable Assembly  
804 by the E3 Ubiquitin Ligases Dma1 and Dma2. *Genetics* **204**, 205–220.
- 805 **Junemann, A., Winterhoff, M., Nordholz, B., Rottner, K., Eichinger, L., Gräf, R. and Faix,**  
806 **J.** (2013). ForC lacks canonical formin activity but bundles actin filaments and is required for  
807 multicellular development of *Dictyostelium* cells. *European Journal of Cell Biology* **92**, 201–  
808 212.
- 809 **Kato, T., Watanabe, N., Morishima, Y., Fujita, A., Ishizaki, T. and Narumiya, S.** (2001).  
810 Localization of a mammalian homolog of diaphanous, mDia1, to the mitotic spindle in HeLa  
811 cells. *J. Cell Sci.* **114**, 775–784.
- 812 **Kovar, D. R. and Pollard, T. D.** (2004). Insertional assembly of actin filament barbed ends in  
813 association with formins produces piconewton forces. *Proceedings of the National Academy of*  
814 *Sciences* **101**, 14725–14730.
- 815 **Leong, S. Y., Ong, B. K. T. and Chu, J. J. H.** (2015). The Role of Misshapen NCK-related  
816 kinase (MINK), a Novel Ste20 Family Kinase, in the IRES-Mediated Protein Translation of  
817 Human Enterovirus 71. *PLOS Pathogens* **11**, e1004686.
- 818 **Li, F. and Higgs, H. N.** (2003). The Mouse Formin mDia1 Is a Potent Actin Nucleation Factor  
819 Regulated by Autoinhibition. *Current Biology* **13**, 1335–1340.
- 820 **Li, F. and Higgs, H. N.** (2005). Dissecting Requirements for Auto-inhibition of Actin  
821 Nucleation by the Formin, mDia1. *Journal of Biological Chemistry* **280**, 6986–6992.
- 822 **Li, M.-Y., Peng, W.-H., Wu, C.-H., Chang, Y.-M., Lin, Y.-L., Chang, G.-D., Wu, H.-C. and**  
823 **Chen, G.-C.** (2019). PTPN3 suppresses lung cancer cell invasiveness by counteracting Src-  
824 mediated DAAM1 activation and actin polymerization. *Oncogene* **38**, 7002–7016.
- 825 **Lu, J., Meng, W., Poy, F., Maiti, S., Goode, B. L. and Eck, M. J.** (2007). Structure of the FH2  
826 domain of Daam1: implications for formin regulation of actin assembly. *J. Mol. Biol.* **369**, 1258–  
827 1269.
- 828 **Maas, R. L., Zeller, R., Woychik, R. P., Vogt, T. F. and Leder, P.** (1990). Disruption of  
829 formin-encoding transcripts in two mutant limb deformity alleles. *Nature* **346**, 853–855.
- 830 **Majumder, S. and Lohia, A.** (2008). *Entamoeba histolytica* Encodes Unique Formins, a Subset  
831 of Which Regulates DNA Content and Cell Division. *Infection and Immunity* **76**, 2368–2378.
- 832 **McConville, M. J., Mullin, K. A., Ilgoutz, S. C. and Teasdale, R. D.** (2002). Secretory  
833 Pathway of Trypanosomatid Parasites. *Microbiology and Molecular Biology Reviews* **66**, 122–  
834 154.

- 835 **Michelot, A., Guérin, C., Huang, S., Ingouff, M., Richard, S., Rodiuc, N., Staiger, C. J. and**  
836 **Blanchoin, L.** (2005). The Formin Homology 1 Domain Modulates the Actin Nucleation and  
837 Bundling Activity of Arabidopsis FORMIN1. *The Plant Cell* **17**, 2296–2313.
- 838 **Moseley, J. B. and Goode, B. L.** (2005). Differential Activities and Regulation of  
839 *Saccharomyces cerevisiae* Formin Proteins Bni1 and Bnr1 by Bud6. *Journal of Biological*  
840 *Chemistry* **280**, 28023–28033.
- 841 **Moseley, J. B., Maiti, S. and Goode, B. L.** (2006). Formin Proteins: Purification and  
842 Measurement of Effects on Actin Assembly. *Methods in Enzymology* 215–234.
- 843 **Nayak, R. C., Sahasrabudde, A. A., Bajpai, V. K. and Gupta, C. M.** (2005). A novel  
844 homologue of coronin colocalizes with actin in filament-like structures in *Leishmania*. *Molecular*  
845 *and Biochemical Parasitology* **143**, 152–164.
- 846 **Okwor, I. and Uzonna, J.** (2016). Social and Economic Burden of Human Leishmaniasis. *The*  
847 *American Journal of Tropical Medicine and Hygiene* **94**, 489–493.
- 848 **Ozaki-Kuroda, K., Yamamoto, Y., Nohara, H., Kinoshita, M., Fujiwara, T., Irie, K. and**  
849 **Takai, Y.** (2001). Dynamic Localization and Function of Bni1p at the Sites of Directed Growth  
850 in *Saccharomyces cerevisiae*. *Molecular and Cellular Biology* **21**, 827–839.
- 851 **Pal, D. S., Mondal, D. K. and Datta, R.** (2015). Identification of Metal Dithiocarbamates as a  
852 Novel Class of Antileishmanial Agents. *Antimicrobial Agents and Chemotherapy* **59**, 2144–  
853 2152.
- 854 **Patel, A. A., Oztug Durer, Z. A., van Loon, A. P., Bremer, K. V. and Quinlan, M. E.** (2018).  
855 *Drosophila* and human FHOD family formin proteins nucleate actin filaments. *Journal of*  
856 *Biological Chemistry* **293**, 532–540.
- 857 **Petersen, J., Nielsen, O., Egel, R. and Hagan, I. M.** (1998). FH3, A Domain Found in Formins,  
858 Targets the Fission Yeast Formin Fus1 to the Projection Tip During Conjugation. *Journal of Cell*  
859 *Biology* **141**, 1217–1228.
- 860 **Pollard, T. D.** (1984). Polymerization of ADP-actin. *Journal of Cell Biology* **99**, 769–777.
- 861 **Ponte-Sucre, A., Gamarro, F., Dujardin, J.-C., Barrett, M. P., López-Vélez, R., García-**  
862 **Hernández, R., Pountain, A. W., Mwenechanya, R. and Papadopoulou, B.** (2017). Drug  
863 resistance and treatment failure in leishmaniasis: A 21st century challenge. *PLOS Neglected*  
864 *Tropical Diseases* **11**, e0006052.
- 865 **Pruyne, D.** (2002). Role of Formins in Actin Assembly: Nucleation and Barbed-End  
866 Association. *Science* **297**, 612–615.
- 867 **Rivero, F., Muramoto, T., Meyer, A.-K., Urushihara, H., Uyeda, T. Q. P. and Kitayama, C.**  
868 (2005). A comparative sequence analysis reveals a common GBD/FH3-FH1-FH2-DAD  
869 architecture in formins from *Dictyostelium*, fungi and metazoa. *BMC Genomics* **6**,.

- 870 **Rizvi, S. A., Neidt, E. M., Cui, J., Feiger, Z., Skau, C. T., Gardel, M. L., Kozmin, S. A. and**  
871 **Kovar, D. R.** (2009). Identification and characterization of a small molecule inhibitor of formin-  
872 mediated actin assembly. *Chem. Biol.* **16**, 1158–1168.
- 873 **Romero, S., Didry, D., Larquet, E., Boisset, N., Pantaloni, D. and Carlier, M.-F.** (2007).  
874 How ATP Hydrolysis Controls Filament Assembly from Profilin-Actin. *Journal of Biological*  
875 *Chemistry* **282**, 8435–8445.
- 876 **Sagot, I., Klee, S. K. and Pellman, D.** (2002). Yeast formins regulate cell polarity by  
877 controlling the assembly of actin cables. *Nature Cell Biology* **4**, 42–50.
- 878 **Sahasrabudde, A. A., Bajpai, V. K. and Gupta, C. M.** (2004). A novel form of actin in  
879 *Leishmania*: molecular characterisation, subcellular localisation and association with  
880 subpellicular microtubules. *Molecular and Biochemical Parasitology* **134**, 105–114.
- 881 **Sahasrabudde, A. A., Nayak, R. C. and Gupta, C. M.** (2009). Ancient *Leishmania* coronin  
882 (CRN12) is involved in microtubule remodeling during cytokinesis. *Journal of Cell Science* **122**,  
883 1691–1699.
- 884 **Schonichen, A., Mannherz, H. G., Behrmann, E., Mazur, A. J., Kuhn, S., Silvan, U.,**  
885 **Schoenenberger, C.-A., Fackler, O. T., Raunser, S., Dehmelt, L., et al.** (2013). FHOD1 is a  
886 combined actin filament capping and bundling factor that selectively associates with actin arcs  
887 and stress fibers. *Journal of Cell Science* **126**, 1891–1901.
- 888 **Scott, B. J., Neidt, E. M. and Kovar, D. R.** (2011). The functionally distinct fission yeast  
889 formins have specific actin-assembly properties. *Molecular Biology of the Cell* **22**, 3826–3839.
- 890 **Shi, L., Huo, J.-W., Chen, S.-S., Xue, J.-X., Gao, W.-Y., Li, X.-Y., Song, Y.-H., Xu, H.-T.,**  
891 **Zhu, X.-W. and Chen, K.** (2019). MicroRNA-22 targets FMNL2 to inhibit melanoma  
892 progression via the regulation of the Wnt/ $\beta$ -catenin signaling pathway and epithelial-  
893 mesenchymal transition. *Eur. Rev. Med. Pharmacol. Sci.* **23**, 5332–5342.
- 894 **Shimada, A., Nyitrai, M., Vetter, I. R., Kühlmann, D., Bugyi, B., Narumiya, S., Geeves, M.**  
895 **A. and Wittinghofer, A.** (2004). The core FH2 domain of diaphanous-related formins is an  
896 elongated actin binding protein that inhibits polymerization. *Mol. Cell* **13**, 511–522.
- 897 **Silkworth, W. T., Kunes, K. L., Nickel, G. C., Phillips, M. L., Quinlan, M. E. and Vizcarra,**  
898 **C. L.** (2018). The neuron-specific formin Delphinin nucleates nonmuscle actin but does not  
899 enhance elongation. *Molecular Biology of the Cell* **29**, 610–621.
- 900 **Skillman, K. M., Daher, W., Ma, C. I., Soldati-Favre, D. and Sibley, L. D.** (2012).  
901 *Toxoplasma gondii* profilin acts primarily to sequester G-actin while formins efficiently nucleate  
902 actin filament formation in vitro. *Biochemistry* **51**, 2486–2495.
- 903 **Stortz, J. F., Del Rosario, M., Singer, M., Wilkes, J. M., Meissner, M. and Das, S.** (2019).  
904 Formin-2 drives polymerisation of actin filaments enabling segregation of apicoplasts and  
905 cytokinesis in *Plasmodium falciparum*. *eLife* **8**,

- 906 **Sunter, J. and Gull, K.** (2017). Shape, form, function and Leishmania pathogenicity: from  
907 textbook descriptions to biological understanding. *Open Biology* **7**, 170165.
- 908 **Tamma, T. V. S., Sahasrabudhe, A. A., Bajpai, V. K. and Gupta, C. M.** (2010).  
909 ADF/cofilin-driven actin dynamics in early events of Leishmania cell division. *Journal of Cell*  
910 *Science* **123**, 1894–1901.
- 911 **Thumkeo, D., Katsura, Y., Nishimura, Y., Kanchanawong, P., Tohyama, K., Ishizaki, T.,**  
912 **Kitajima, S., Takahashi, C., Hirata, T., Watanabe, N., et al.** (2020). mDia1/3-dependent actin  
913 polymerization spatiotemporally controls LAT phosphorylation by Zap70 at the immune  
914 synapse. *Science Advances* **6**, eaay2432.
- 915 **Tosetti, N., Dos Santos Pacheco, N., Soldati-Favre, D. and Jacot, D.** (2019). Three F-actin  
916 assembly centers regulate organelle inheritance, cell-cell communication and motility in  
917 *Toxoplasma gondii*. *eLife* **8**,.
- 918 **Tsigankov, P., Gherardini, P. F., Helmer-Citterich, M., Späth, G. F., Myler, P. J. and**  
919 **Zilberstein, D.** (2014). Regulation Dynamics of Leishmania Differentiation: Deconvoluting  
920 Signals and Identifying Phosphorylation Trends. *Molecular & Cellular Proteomics* **13**, 1787–  
921 1799.
- 922 **Vasconcelos, E. J. R., Pacheco, A. C. L., Gouveia, J. J. S., Araujo, F. F., Diniz, M.,**  
923 **Kamimura, M., Costa, M., Araujo-Filho, R. and Oliveira, D.** (2008). Actin-Interacting  
924 Proteins in flagellated pathogenic Leishmania spp.: a genome-based bioinformatics report on  
925 profilins, formins and katanins. *Int. J. Funct. Inform. Personal. Med.* **1**, 234–252.
- 926 **Wasserman, S.** (1998). FH proteins as cytoskeletal organizers. *Trends in Cell Biology* **8**, 111–  
927 115.
- 928 **Xu, Y., Moseley, J. B., Sagot, I., Poy, F., Pellman, D., Goode, B. L. and Eck, M. J.** (2004).  
929 Crystal Structures of a Formin Homology-2 Domain Reveal a Tethered Dimer Architecture. *Cell*  
930 **116**, 711–723.
- 931 **Yamashiro, S., Yamakita, Y., Ono, S. and Matsumura, F.** (1998). Fascin, an Actin-bundling  
932 Protein, Induces Membrane Protrusions and Increases Cell Motility of Epithelial Cells.  
933 *Molecular Biology of the Cell* **9**, 993–1006.
- 934 **Yang, J., Zhou, L., Zhang, Y., Zheng, J., Zhou, J., Wei, Z. and Zou, J.** (2019). DIAPH1 Is  
935 Upregulated and Inhibits Cell Apoptosis through ATR/p53/Caspase-3 Signaling Pathway in  
936 Laryngeal Squamous Cell Carcinoma. *Dis. Markers* **2019**, 6716472.
- 937 **Zeller, R., Haramis, A. G., Zuniga, A., McGuigan, C., Dono, R., Davidson, G., Chabanis, S.**  
938 **and Gibson, T.** (1999). Formin defines a large family of morphoregulatory genes and functions  
939 in establishment of the polarising region. *Cell and Tissue Research* **296**, 85–93.
- 940 **Zilberstein, D.** (2015). Proteomic Analysis of Posttranslational Modifications Using iTRAQ in  
941 Leishmania. *Methods in Molecular Biology* 261–268.

942 **Zimmermann, D., Morgenthaler, A. N., Kovar, D. R. and Suarez, C.** (2016). In Vitro  
943 Biochemical Characterization of Cytokinesis Actin-Binding Proteins. *Methods in Molecular*  
944 *Biology* 151–179.

945 **Ziske, M. A., Pettee, K. M., Khaing, M., Rubinic, K. and Eisenmann, K. M.** (2016).  
946 SMIFH2-mediated mDia formin functional inhibition potentiates chemotherapeutic targeting of  
947 human ovarian cancer spheroids. *Biochem. Biophys. Res. Commun.* **472**, 33–39.

948  
949

**Figure 1**

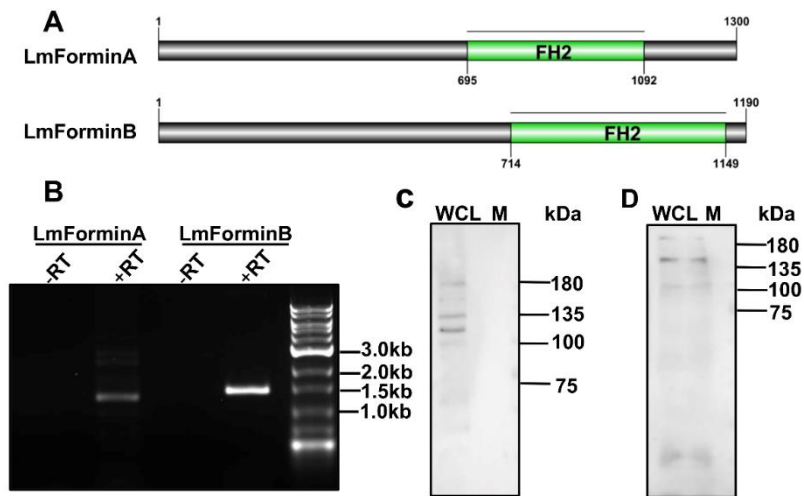

950

951

Figure 2

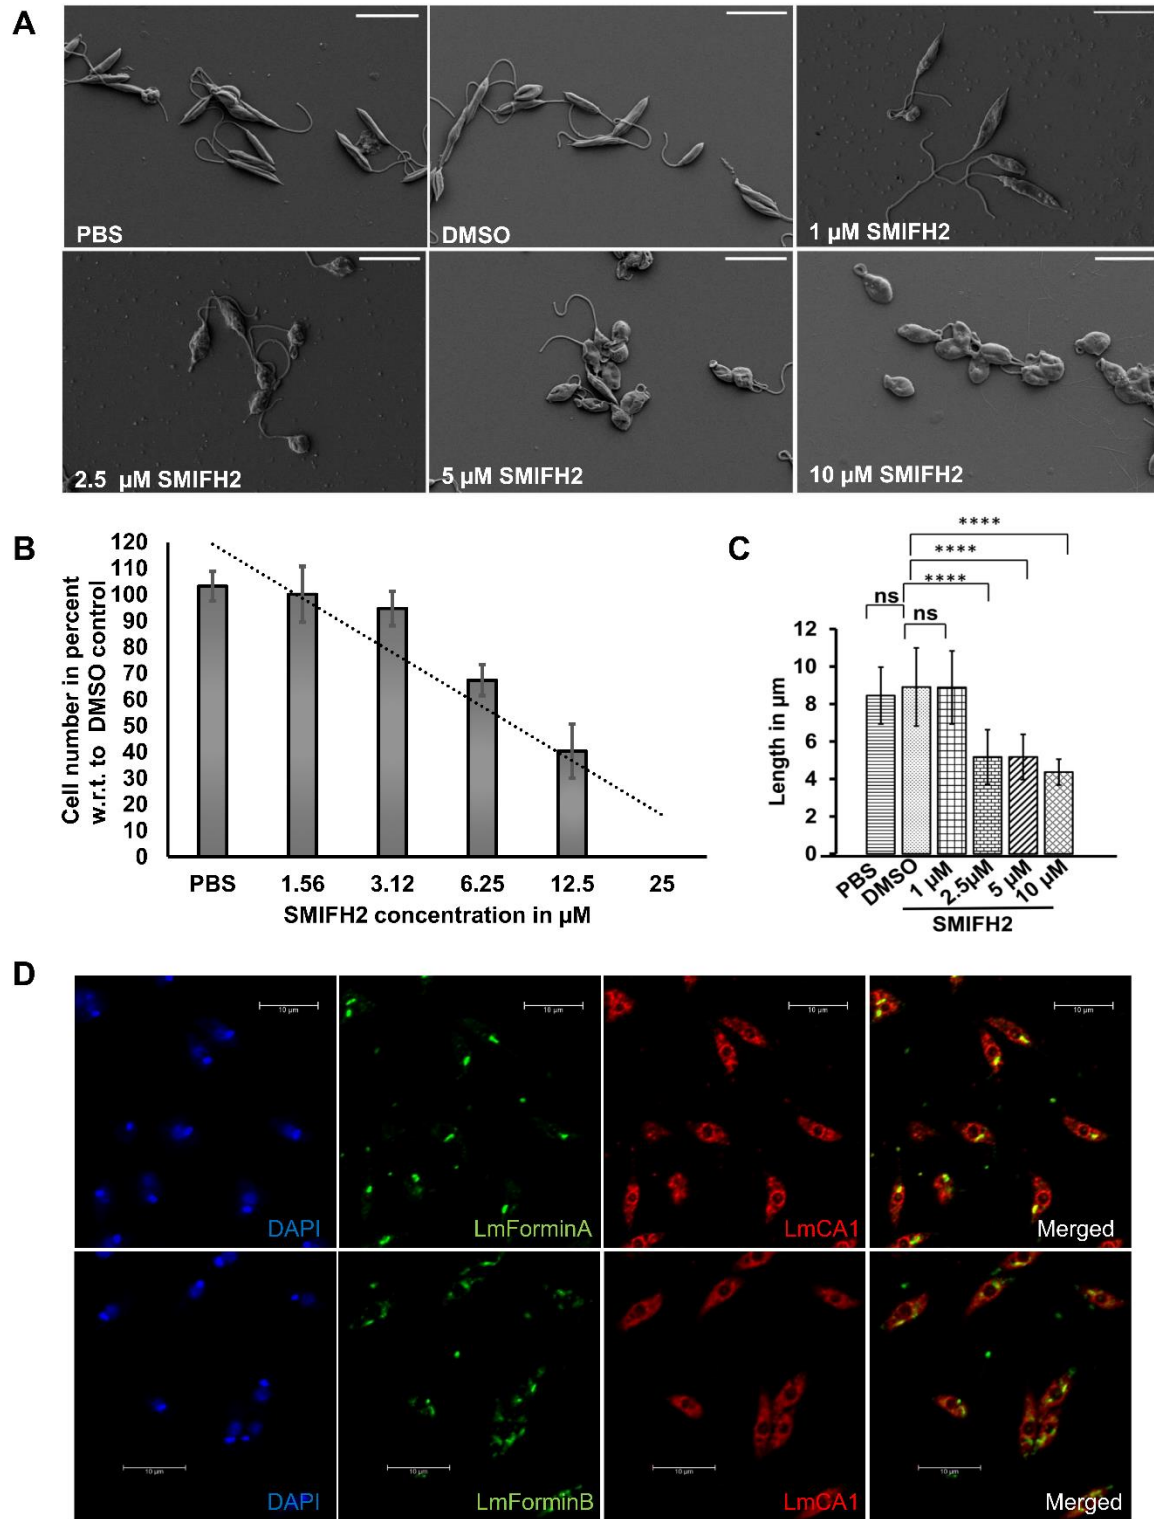

952



953

Figure 3

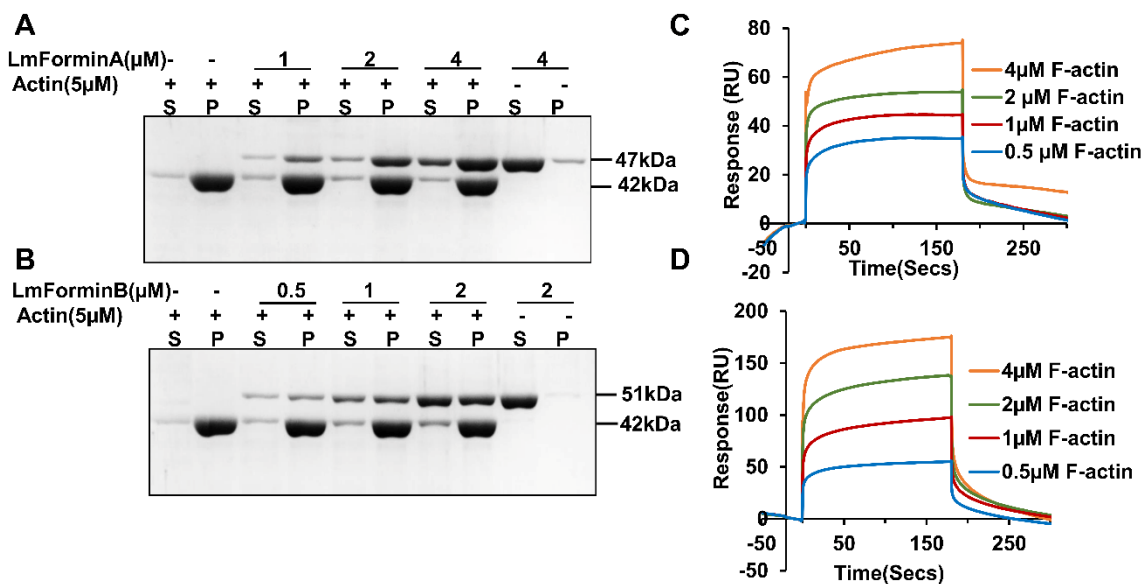

954

955

Figure 4

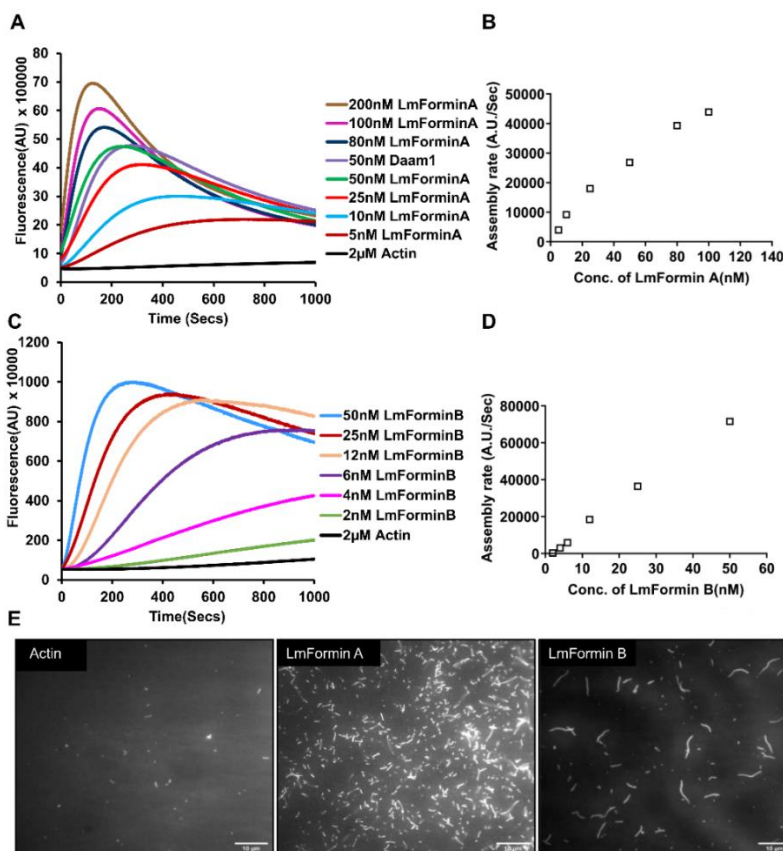

956

957

Figure 5

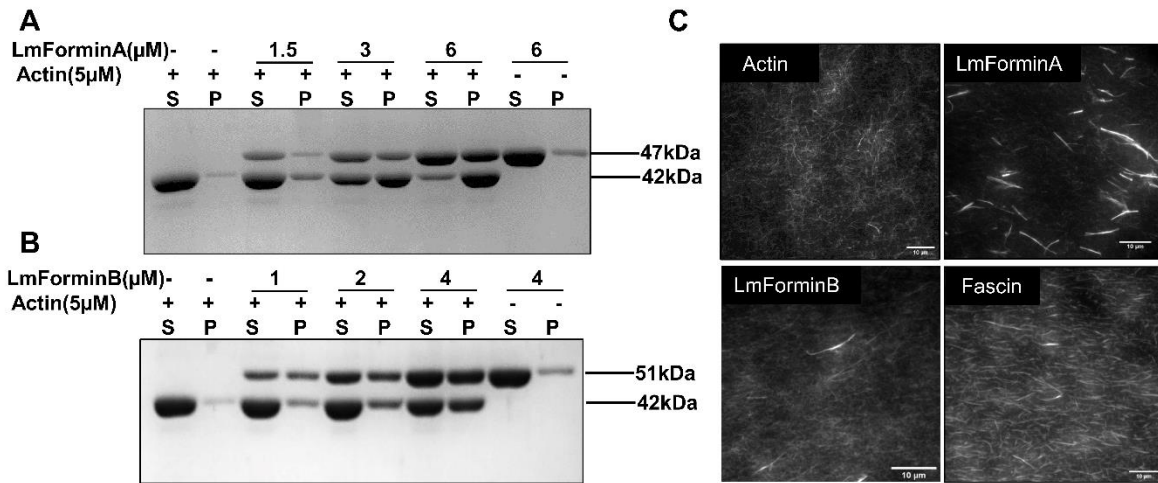

958

959

960

961

962

963

964

965

966

967

968

969

970

971

972

973

974

Figure 6

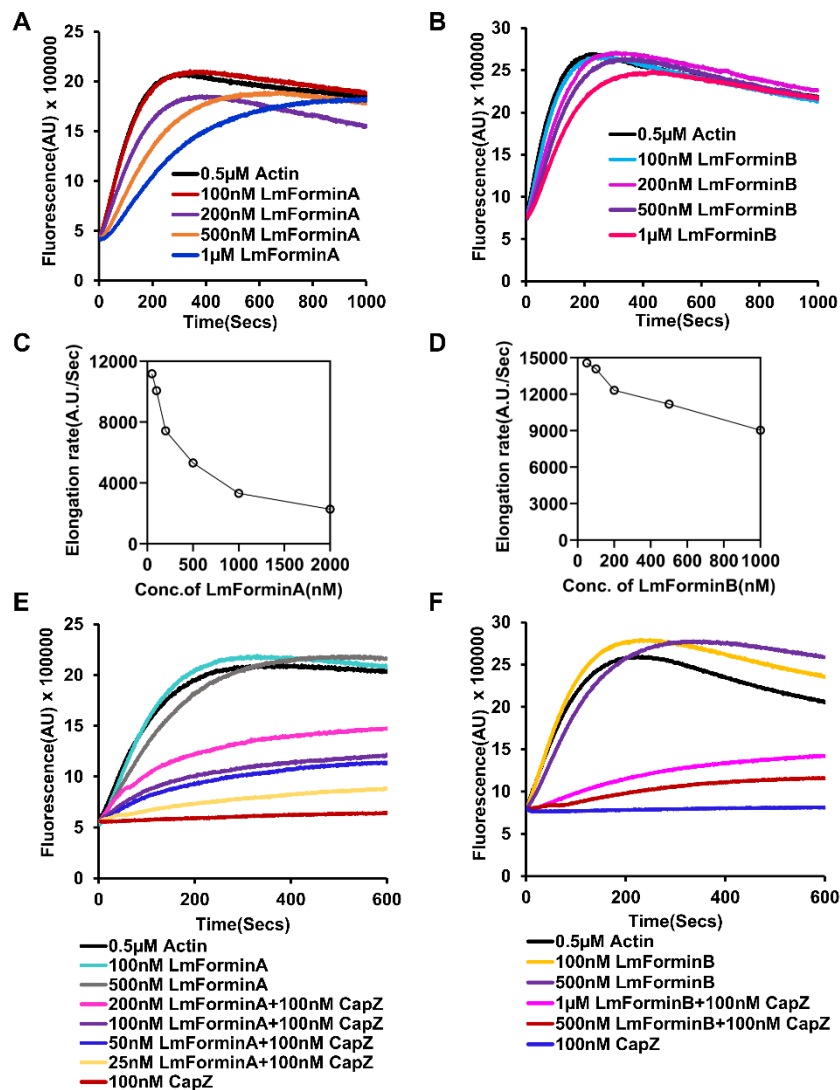

975

976

977

978

979

980

981

982

983

984

Figure 7

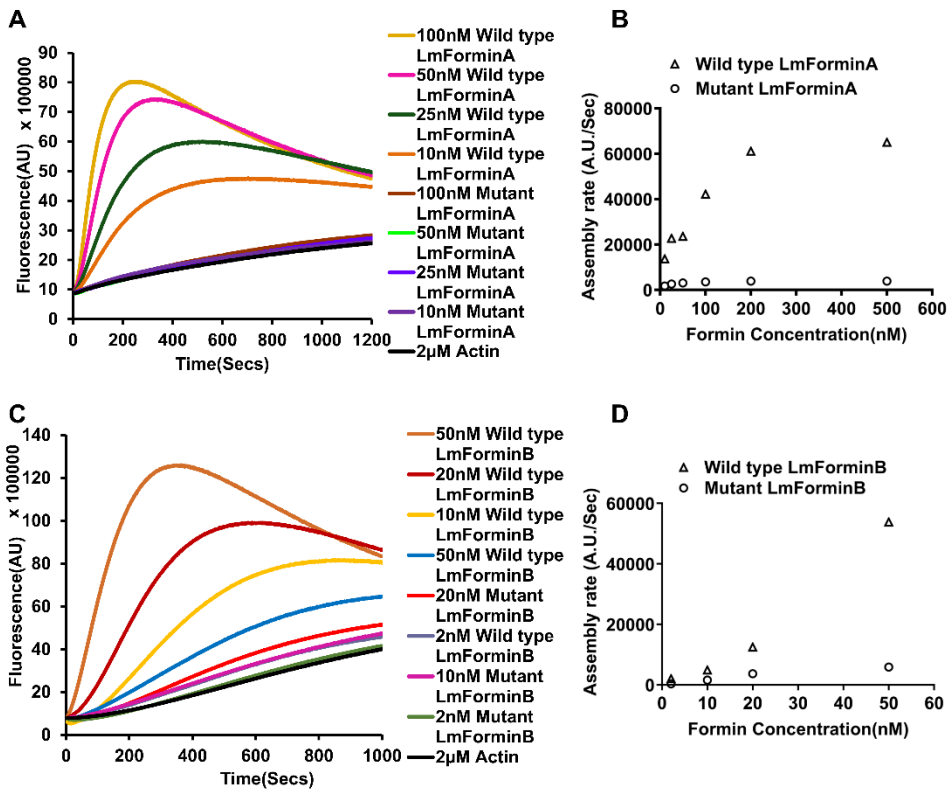

985

Figure S1

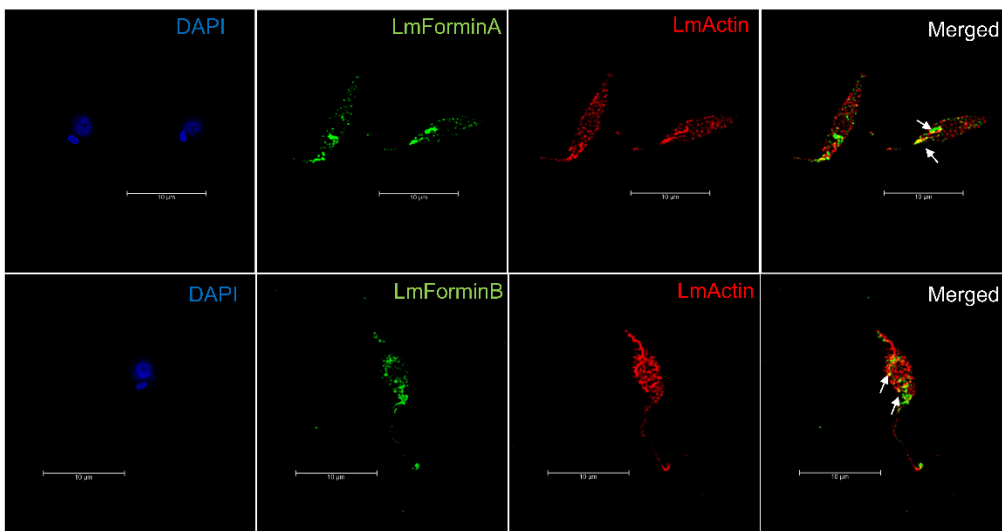

986

Figure S2



988

Figure S3

| LmForminA |                     |          |            | LmForminB |                      |          |            |
|-----------|---------------------|----------|------------|-----------|----------------------|----------|------------|
| Formin    | Species             | Identity | Similarity | Formin    | Species              | Identity | Similarity |
| TC00      | <i>T. cruzi</i>     | 40.9%    | 57%        | TC00      | <i>T. cruzi</i>      | 18.1%    | 34.8%      |
| Bni1      | <i>S.cerevisiae</i> | 23.2%    | 40.1%      | Bni1      | <i>S.cerevisiae</i>  | 21.3%    | 35.3%      |
| Bnr1      | <i>S.cerevisiae</i> | 17.9%    | 33.5%      | Bnr1      | <i>S.cerevisiae</i>  | 20.6%    | 36.9%      |
| cdc12     | <i>S.pombe</i>      | 20.1%    | 37.0%      | cdc12     | <i>S.pombe</i>       | 19.1%    | 36.1%      |
| dDia2     | <i>D.discoideum</i> | 24.7%    | 44.8%      | dDia2     | <i>D. discoideum</i> | 20.7%    | 39.0%      |
| AFH1      | <i>A.thaliana</i>   | 22.3%    | 42.1%      | AFH1      | <i>A.thaliana</i>    | 24.2%    | 43.5%      |
| mDia1     | <i>M.musculus</i>   | 20.8%    | 36.1%      | mDia1     | <i>M. musculus</i>   | 21.8%    | 39.7       |
| Daam1     | <i>H.sapiens</i>    | 22.6%    | 44.2%      | Daam1     | <i>H.sapiens</i>     | 21.4%    | 42.6%      |

989

990

Figure S4

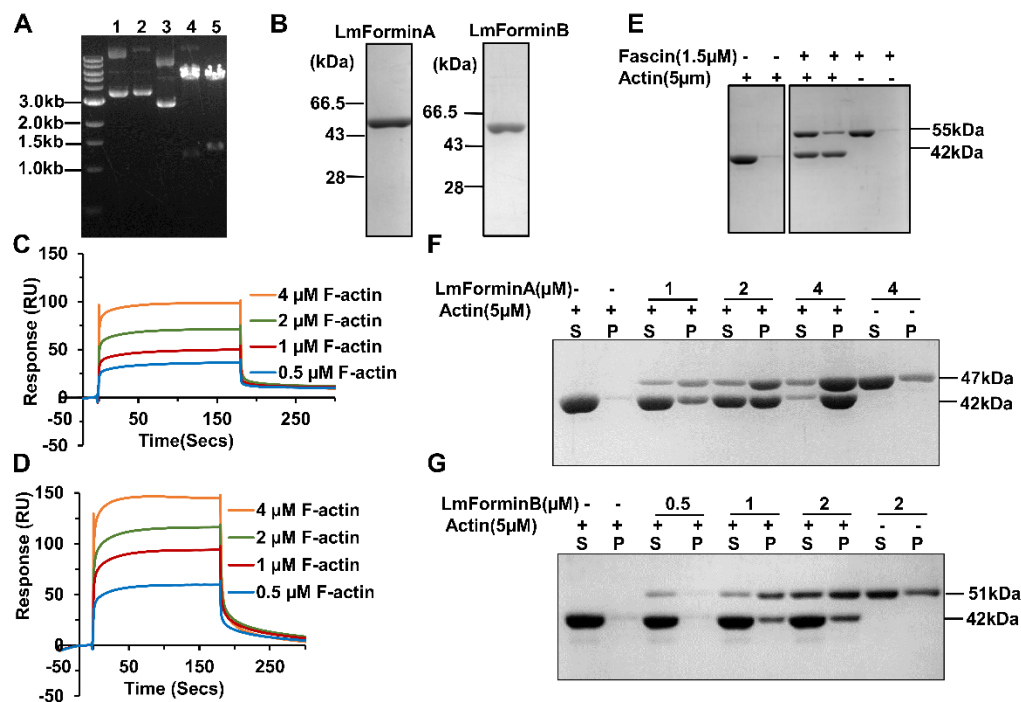

991

992

Figure S5

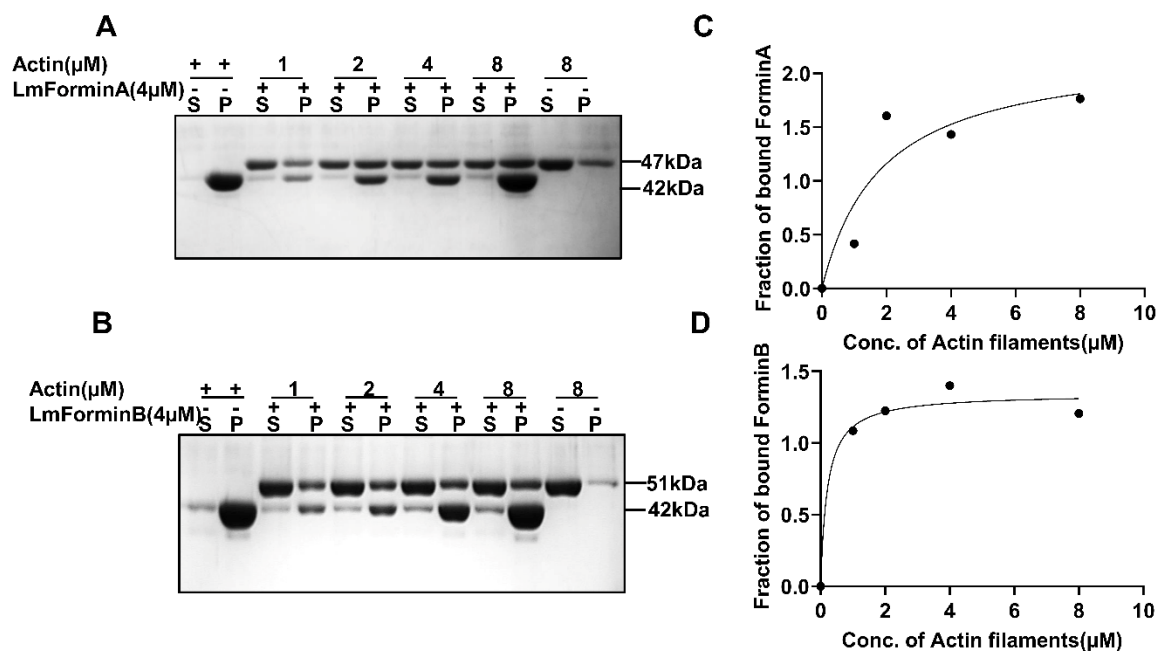

993

994

Figure S6

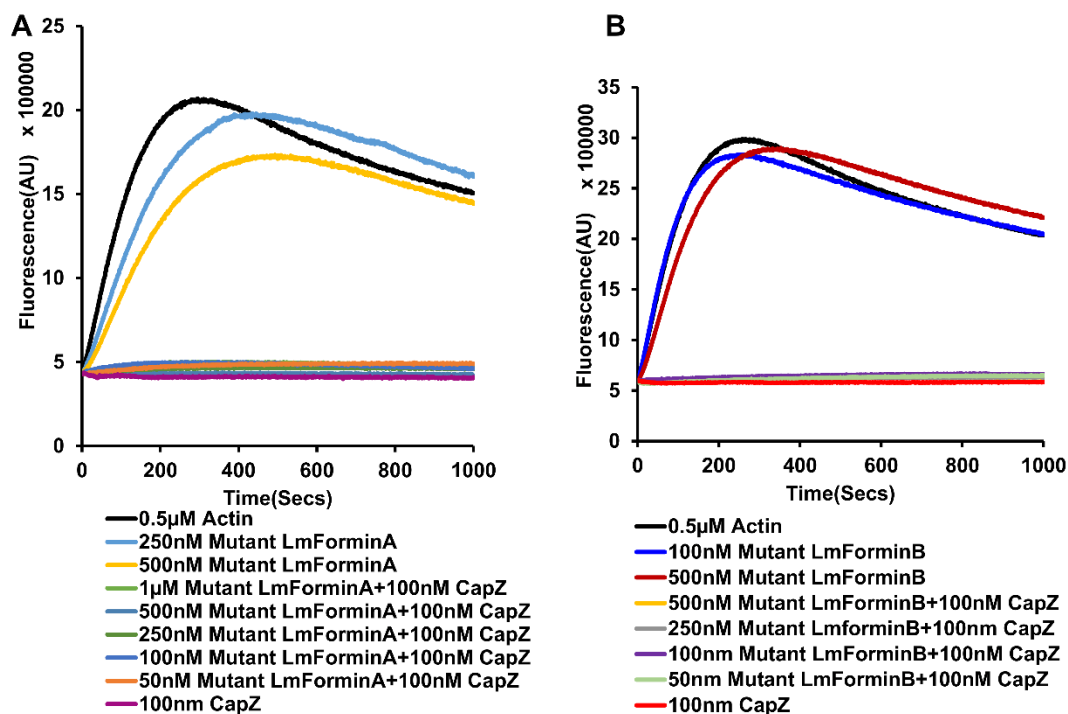

995

996

997

**Figure S7**

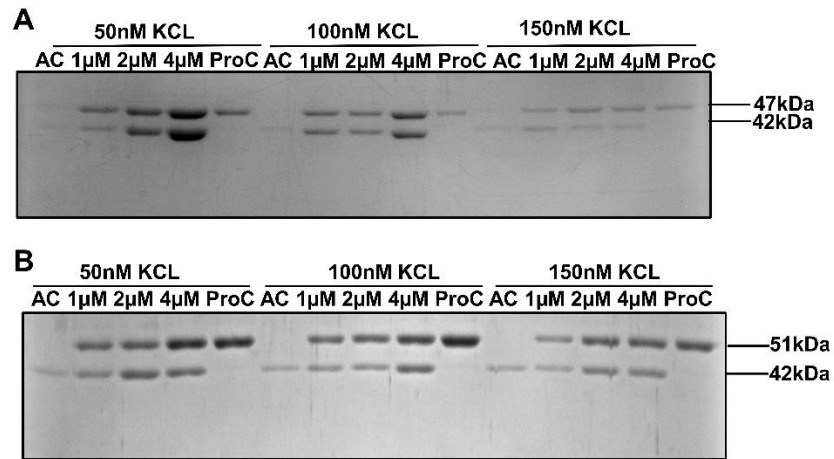

998
